# Supplementary material for: Thermodynamics of metallocene catalyst activation: alignment of theory and experiment
Source: Royal Society of Chemistry journal article supplement (doi:10.1039/d2dt01711c), 2022-01-01
Supplement: d2dt01711c2.pdf [file d2dt01711c2.pdf]

Supporting Information for the Manuscript entitled “Thermodynamics of Metallocene Catalyst Activation:  
Alignment of Theory and Experiment”

### Table of Contents

|                                                                                                                                                                                                                                                                                                                 |    |
|-----------------------------------------------------------------------------------------------------------------------------------------------------------------------------------------------------------------------------------------------------------------------------------------------------------------|----|
| Table S-1. Dissociation of $R_6Al_2$ in solution without correction due to specific solvation at M06-2X/TZVP level of theory. $\Delta G$ and $\Delta H$ in $\text{kJ mol}^{-1}$ , $\Delta S$ in $\text{J mol}^{-1} \text{K}^{-1}$ . $p = 1 \text{ atm}$ , $T = 298\text{K}$ , except for benzene 313K. ....     | 2  |
| Table S-2. M06-2X/TZVP calculated $R_3Al$ -solvent and $R_6Al_2$ -solvent interaction enthalpies ( $\Delta H$ ) and specific solvation ( $\Delta\Delta H$ ) calculated as the enthalpy difference. $\Delta H$ in $\text{kJ mol}^{-1}$ , $p = 1 \text{ atm}$ , $T = 298\text{K}$ , except for benzene 313K. .... | 2  |
| Table S-3 – Absolute values of thermodynamic functions (au). Method = M06-2X/TZVP, $p = 1 \text{ atm}$ and $T = 298 \text{ K}$ unless otherwise noted. ....                                                                                                                                                     | 3  |
| Boltzmann Weighting of Equilibrium 2 .....                                                                                                                                                                                                                                                                      | 36 |

**Table S-1.** Dissociation of  $R_6Al_2$  in solution without correction due to specific solvation at M06-2X/TZVP level of theory.  $\Delta G$  and  $\Delta H$  in  $\text{kJ mol}^{-1}$ ,  $\Delta S$  in  $\text{J mol}^{-1} \text{K}^{-1}$ .  $p = 1 \text{ atm}$ ,  $T = 298\text{K}$ , except for benzene 313K.

| R    | Solvent    | $\Delta H$ | $\Delta H\text{-qh}$ | $\Delta G$ ( $\Delta S$ ) | $\Delta G\text{-qh}$ ( $\Delta S\text{-qh}$ ) | $\Delta G\text{-qh-tr}$ ( $\Delta S\text{-qh-tr}$ ) |
|------|------------|------------|----------------------|---------------------------|-----------------------------------------------|-----------------------------------------------------|
| Me   | mesitylene | 81.5       | 79.6                 | 13.7 (228)                | 23.7 (188)                                    | 37.7 (141)                                          |
| Me   | heptane    | 81.5       | 79.2                 | 4.3 (259)                 | 22.9 (189)                                    | 35.7 (146)                                          |
| Me   | benzene    | 80.3       | 78.1                 | 9.4 (227)                 | 19.2 (188)                                    | 33.8 (142)                                          |
| Et   | mesitylene | 81.9       | 77.6                 | -5.8 (294)                | 9.5 (229)                                     | 23.4 (182)                                          |
| Et   | heptane    | 82.7       | 78.5                 | 0.2 (276)                 | 10.7 (228)                                    | 23.5 (184)                                          |
| i-Bu | heptane    | 38.2       | 37.8                 | -30.6 (231)               | -35.6 (246)                                   | -22.7 (203)                                         |

**Table S-2.** M06-2X/TZVP calculated  $R_3Al$ -solvent and  $R_6Al_2$ -solvent interaction enthalpies ( $\Delta H$ ) and specific solvation ( $\Delta\Delta H$ ) calculated as the enthalpy difference.  $\Delta H$  in  $\text{kJ mol}^{-1}$ ,  $p = 1 \text{ atm}$ ,  $T = 298\text{K}$ , except for benzene 313K.

| Adduct                 | $\Delta H$ | $\Delta H\text{-qh}$ | Adduct                       | $\Delta H$ | $\Delta H\text{-qh}$ |
|------------------------|------------|----------------------|------------------------------|------------|----------------------|
| $Me_3Al$ -mesitylene   | -37.4      | -39.4                | $Et_3Al$ -mesitylene         | -41.2      | -43.8                |
| $Me_6Al_2$ -mesitylene | -14.2      | -20.3                | $Et_6Al_2$ -mesitylene       | -18.5      | -21.4                |
| $\Delta\Delta H$       | 23.2       | 19.1                 | $\Delta\Delta H$             | 22.8       | 22.3                 |
| $Me_3Al$ -heptane      | -18.7      | -20.6                | $Et_3Al$ -heptane            | -25.1      | -27.2                |
| $Me_6Al_2$ -heptane    | -8.0       | -12.8                | $Et_6Al_2$ -heptane          | -15.7      | -20.6                |
| $\Delta\Delta H$       | 10.6       | 7.8                  | $\Delta\Delta H$             | 9.4        | 6.5                  |
| $Me_3Al$ -benzene      | -30.7      | -33.1                | $i\text{-Bu}_3Al$ -heptane   | -18.3      | -21.7                |
| $Me_6Al_2$ -benzene    | -13.5      | -18.5                | $i\text{-Bu}_6Al_2$ -heptane | -16.9      | -21.5                |
| $\Delta\Delta H$       | 17.1       | 14.6                 | $\Delta\Delta H$             | 1.3        | 0.2                  |

**Table S-3** – Absolute values of thermodynamic functions (au). Method = M06-2X/TZVP,  $p = 1$  atm and  $T = 298$  K unless otherwise noted.

|                                              | Function         | Gas-phase   | PCM                    |             |             |             |
|----------------------------------------------|------------------|-------------|------------------------|-------------|-------------|-------------|
|                                              |                  |             | Benzene ( $T = 313$ K) | Heptane     | Mesitylene  | Toluene     |
| Me <sub>3</sub> Al                           | <i>E</i>         | -362.138908 | -362.140397            | -362.140087 | -362.140445 | -362.140451 |
|                                              | <i>H</i>         | -362.022669 | -362.023751            | -362.024067 | -362.024555 | -362.024512 |
|                                              | <i>H</i> -qh     | -362.024263 | -362.025394            | -362.025671 | -362.026131 | -362.026095 |
|                                              | <i>TS</i>        | 0.045747    | 0.045416               | 0.044389    | 0.042741    | 0.043349    |
|                                              | <i>G</i>         | -362.068416 | -362.069167            | -362.068456 | -362.067296 | -362.067861 |
|                                              | <i>TS</i> -qh    | 0.039939    | 0.042724               | 0.040017    | 0.040036    | 0.039984    |
|                                              | <i>G</i> -qh     | -362.064202 | -362.068118            | -362.065688 | -362.066167 | -362.066079 |
|                                              | <i>TS</i> -tr    |             | 0.039872               | 0.039499    | 0.037423    | 0.038091    |
|                                              | <i>G</i> -tr     |             | -362.063623            | -362.063566 | -362.061978 | -362.062603 |
|                                              | <i>TS</i> -qh-tr |             | 0.037179               | 0.035127    | 0.034718    | 0.034726    |
|                                              | <i>G</i> -qh-tr  |             | -362.062573            | -362.060798 | -362.060849 | -362.060821 |
| Me <sub>3</sub> Al (M06/def2-TZVP)           | <i>E</i>         | -362.147349 |                        |             |             |             |
| Me <sub>3</sub> Al (MN15/def2-TZVP)          | <i>E</i>         | -361.973463 |                        |             |             |             |
| Me <sub>3</sub> Al (MN15/def2-TZVPD)         | <i>E</i>         | -361.974321 |                        |             |             |             |
| Me <sub>3</sub> Al (MP2/def2-TZVPD)          | <i>E</i>         | -361.429548 |                        |             |             |             |
|                                              | <i>H</i>         | -361.313521 |                        |             |             |             |
|                                              | <i>H</i> -qh     | -361.315098 |                        |             |             |             |
| Me <sub>3</sub> Al (CCSD(T)//MP2/def2-TZVPD) | <i>E</i>         | -361.508497 |                        |             |             |             |
| Me <sub>3</sub> Al ( $T = 418$ K)            | <i>E</i>         | -362.138908 |                        |             |             |             |
|                                              | <i>H</i>         | -362.016499 |                        |             |             |             |
|                                              | <i>H</i> -qh     | -362.018717 |                        |             |             |             |
|                                              | <i>TS</i>        | 0.071367    |                        |             |             |             |
|                                              | <i>G</i>         | -362.087866 |                        |             |             |             |
|                                              | <i>TS</i> -qh    | 0.063208    |                        |             |             |             |
|                                              | <i>G</i> -qh     | -362.081925 |                        |             |             |             |
| Me <sub>6</sub> Al <sub>2</sub>              | <i>E</i>         | -724.312906 | -724.314371            | -724.314085 | -724.314807 | -724.314434 |
|                                              | <i>H</i>         | -724.077659 | -724.078104            | -724.079177 | -724.080159 | -724.079641 |
|                                              | <i>H</i> -qh     | -724.080013 | -724.080526            | -724.081503 | -724.082594 | -724.081964 |
|                                              | <i>TS</i>        | 0.059412    | 0.063812               | 0.059363    | 0.059644    | 0.059376    |
|                                              | <i>G</i>         | -724.137071 | -724.141916            | -724.138540 | -724.139803 | -724.139017 |
|                                              | <i>TS</i> -qh    | 0.058555    | 0.063030               | 0.058597    | 0.058763    | 0.058626    |
|                                              | <i>G</i> -qh     | -724.138568 | -724.143556            | -724.140100 | -724.141357 | -724.140590 |
|                                              | <i>TS</i> -tr    |             | 0.058267               | 0.054473    | 0.054326    | 0.054118    |
|                                              | <i>G</i> -tr     |             | -724.136371            | -724.133650 | -724.134485 | -724.133759 |
|                                              | <i>TS</i> -qh-tr |             | 0.057485               | 0.053707    | 0.053446    | 0.053368    |

|                                                           | <i>G</i> -qh-tr  |             | -724.138011 | -724.135210 | -724.136040 | -724.135332 |
|-----------------------------------------------------------|------------------|-------------|-------------|-------------|-------------|-------------|
| Me <sub>6</sub> Al <sub>2</sub> ( <i>T</i> = 418 K)       | <i>E</i>         | -724.312906 |             |             |             |             |
|                                                           | <i>H</i>         | -724.064807 |             |             |             |             |
|                                                           | <i>H</i> -qh     | -724.068028 |             |             |             |             |
|                                                           | <i>TS</i>        | 0.098356    |             |             |             |             |
|                                                           | <i>G</i>         | -724.163163 |             |             |             |             |
|                                                           | <i>TS</i> -qh    | 0.097146    |             |             |             |             |
|                                                           | <i>G</i> -qh     | -724.165174 |             |             |             |             |
| Me <sub>6</sub> Al <sub>2</sub> (M06/def2-TZVP)           | <i>E</i>         | -724.332105 |             |             |             |             |
| Me <sub>6</sub> Al <sub>2</sub> (MN15/def2-TZVP)          | <i>E</i>         | -723.986419 |             |             |             |             |
| Me <sub>6</sub> Al <sub>2</sub> (MN15/def2-TZVPD)         | <i>E</i>         | -723.988448 |             |             |             |             |
| Me <sub>6</sub> Al <sub>2</sub> (MP2/def2-TZVPD)          | <i>E</i>         | -722.897568 |             |             |             |             |
|                                                           | <i>H</i>         | -722.662855 |             |             |             |             |
|                                                           | <i>H</i> -qh     | -722.664948 |             |             |             |             |
| Me <sub>6</sub> Al <sub>2</sub> (CCSD(T)//MP2/def2-TZVPD) | <i>E</i>         | -723.053750 |             |             |             |             |
| Et <sub>3</sub> Al                                        | <i>E</i>         | -480.038193 |             | -480.039223 | -480.039611 |             |
|                                                           | <i>H</i>         | -479.830338 |             | -479.831632 | -479.832185 |             |
|                                                           | <i>H</i> -qh     | -479.832776 |             | -479.834066 | -479.834643 |             |
|                                                           | <i>TS</i>        | 0.053113    |             | 0.052614    | 0.053610    |             |
|                                                           | <i>G</i>         | -479.883451 |             | -479.884246 | -479.885795 |             |
|                                                           | <i>TS</i> -qh    | 0.049016    |             | 0.049034    | 0.049092    |             |
|                                                           | <i>G</i> -qh     | -479.881792 |             | -479.883100 | -479.883735 |             |
|                                                           | <i>TS</i> -tr    |             |             | 0.047724    | 0.048293    |             |
|                                                           | <i>G</i> -tr     |             |             | -479.879356 | -479.880478 |             |
|                                                           | <i>TS</i> -qh-tr |             |             | 0.044144    | 0.043774    |             |
|                                                           | <i>G</i> -qh-tr  |             |             | -479.878210 | -479.878417 |             |
| Et <sub>3</sub> Al ( <i>T</i> = 418 K)                    | <i>E</i>         | -480.038193 |             |             |             |             |
|                                                           | <i>H</i>         | -479.821080 |             |             |             |             |
|                                                           | <i>H</i> -qh     | -479.824459 |             |             |             |             |
|                                                           | <i>TS</i>        | 0.085299    |             |             |             |             |
|                                                           | <i>G</i>         | -479.906379 |             |             |             |             |
|                                                           | <i>TS</i> -qh    | 0.079533    |             |             |             |             |
|                                                           | <i>G</i> -qh     | -479.903992 |             |             |             |             |
| Et <sub>6</sub> Al <sub>2</sub> C <sub>s</sub>            | <i>E</i>         | -960.113237 |             |             |             |             |
|                                                           | <i>H</i>         | -959.694593 |             |             |             |             |
|                                                           | <i>H</i> -qh     | -959.698990 |             |             |             |             |
|                                                           | <i>TS</i>        | 0.079576    |             |             |             |             |
|                                                           | <i>G</i>         | -959.774169 |             |             |             |             |

|                                                          |                                                                                                                                                                 |                                                                                                      |  |                                                                                                                                                       |                                                                                                                                                       |  |
|----------------------------------------------------------|-----------------------------------------------------------------------------------------------------------------------------------------------------------------|------------------------------------------------------------------------------------------------------|--|-------------------------------------------------------------------------------------------------------------------------------------------------------|-------------------------------------------------------------------------------------------------------------------------------------------------------|--|
|                                                          | <i>TS-qh</i><br><i>G-qh</i>                                                                                                                                     | 0.074495<br>-959.773485                                                                              |  |                                                                                                                                                       |                                                                                                                                                       |  |
| $\text{Et}_6\text{Al}_2\text{C}_s$ ( $T = 418\text{K}$ ) | <i>E</i><br><i>H</i><br><i>H-qh</i><br><i>TS</i><br><i>G</i><br><i>TS-qh</i><br><i>G-qh</i>                                                                     | -960.113237<br>-959.675594<br>-959.681658<br>0.133799<br>-959.809393<br>0.126647<br>-959.808305      |  |                                                                                                                                                       |                                                                                                                                                       |  |
| $\text{Et}_6\text{Al}_2\text{C}_2$                       | <i>E</i><br><i>H</i><br><i>H-qh</i><br><i>TS</i><br><i>G</i><br><i>TS-qh</i><br><i>G-qh</i><br><i>TS-tr</i><br><i>G-tr</i><br><i>TS-qh-tr</i><br><i>G-qh-tr</i> |                                                                                                      |  | -960.113517<br>-959.694749<br>-959.698046<br>0.073832<br>-959.768581<br>0.072229<br>-959.770275<br>0.068943<br>-959.763692<br>0.067340<br>-959.765386 | -960.114116<br>-959.695560<br>-959.698849<br>0.073822<br>-959.769382<br>0.072230<br>-959.771079<br>0.068505<br>-959.764065<br>0.066912<br>-959.765761 |  |
| <i>i</i> - $\text{Bu}_3\text{Al}$                        | <i>E</i><br><i>H</i><br><i>H-qh</i><br><i>TS</i><br><i>G</i><br><i>TS-qh</i><br><i>G-qh</i><br><i>TS-tr</i><br><i>G-tr</i><br><i>TS-qh-tr</i><br><i>G-qh-tr</i> | -715.887990<br>-715.501642<br>-715.505019<br>0.066305<br>-715.567947<br>0.062962<br>-715.567981      |  | -715.888694<br>-715.502755<br>-715.506155<br>0.067654<br>-715.570409<br>0.064098<br>-715.570253<br>0.062764<br>-715.565519<br>0.059208<br>-715.565363 |                                                                                                                                                       |  |
| <i>i</i> - $\text{Bu}_6\text{Al}_2\text{C}_i$            | <i>E</i><br><i>H</i><br><i>H-qh</i><br><i>TS</i><br><i>G</i><br><i>TS-qh</i><br><i>G-qh</i>                                                                     | -1431.800615<br>-1431.024325<br>-1431.031311<br>0.110623<br>-1431.134948<br>0.101885<br>-1431.133196 |  |                                                                                                                                                       |                                                                                                                                                       |  |

|                                                  |                 |                 |             |              |  |  |
|--------------------------------------------------|-----------------|-----------------|-------------|--------------|--|--|
| i-Bu <sub>6</sub> Al <sub>2</sub> C <sub>2</sub> | <i>E</i>        |                 |             | -1431.796686 |  |  |
|                                                  | <i>H</i>        |                 |             | -1431.020068 |  |  |
|                                                  | <i>H-qh</i>     |                 |             | -1431.026691 |  |  |
|                                                  | <i>TS</i>       |                 |             | 0.109098     |  |  |
|                                                  | <i>G</i>        |                 |             | -1431.129166 |  |  |
|                                                  | <i>TS-qh</i>    |                 |             | 0.100270     |  |  |
|                                                  | <i>G-qh</i>     |                 |             | -1431.126961 |  |  |
|                                                  | <i>TS-tr</i>    |                 |             | 0.104209     |  |  |
|                                                  | <i>G-tr</i>     |                 |             | -1431.124277 |  |  |
|                                                  | <i>TS-qh-tr</i> |                 |             | 0.095381     |  |  |
|                                                  | <i>G-qh-tr</i>  |                 |             | -1431.122072 |  |  |
| Benzene ( <i>T</i> = 313 K)                      | <i>E</i>        | -232.215642     | -232.217217 |              |  |  |
|                                                  | <i>H</i>        | -232.108650     | -232.110374 |              |  |  |
|                                                  | <i>H-qh</i>     | -232.108650     | -232.110374 |              |  |  |
|                                                  | <i>TS</i>       | 0.032442        | 0.032469    |              |  |  |
|                                                  | <i>G</i>        | -232.141092     | -232.142843 |              |  |  |
|                                                  | <i>TS-qh</i>    | 0.032442        | 0.032469    |              |  |  |
|                                                  | <i>G-qh</i>     | -232.141092     | -232.142843 |              |  |  |
|                                                  | <i>TS-tr</i>    |                 | 0.026925    |              |  |  |
|                                                  | <i>G-tr</i>     |                 | -232.137299 |              |  |  |
|                                                  |                 | <i>TS-qh-tr</i> |             | 0.026925     |  |  |
|                                                  | <i>G-qh-tr</i>  |                 | -232.137299 |              |  |  |
| Benzene (M06/def2-TZVP)                          | <i>E</i>        | -232.224629     |             |              |  |  |
| Benzene (MN15/def2-TZVP)                         | <i>E</i>        | -232.028399     |             |              |  |  |
| Benzene (MN15/def2-TZVPD)                        | <i>E</i>        | -232.029440     |             |              |  |  |
| Benzene (MP2/def2-TZVPD)                         | <i>E</i>        | -231.720165     |             |              |  |  |
| Benzene (CCSD(T)//MP2/def2-TZVPD)                | <i>E</i>        | -231.798455     |             |              |  |  |
| Heptane                                          | <i>E</i>        | -276.333351     |             | -276.333576  |  |  |
|                                                  | <i>H</i>        | -276.103672     |             | -276.104102  |  |  |
|                                                  | <i>H-qh</i>     | -276.105000     |             | -276.105450  |  |  |
|                                                  | <i>TS</i>       | 0.045016        |             | 0.045107     |  |  |
|                                                  | <i>G</i>        | -276.148688     |             | -276.149209  |  |  |
|                                                  | <i>TS-qh</i>    | 0.044227        |             | 0.044269     |  |  |
|                                                  | <i>G-qh</i>     | -276.149227     |             | -276.149719  |  |  |
|                                                  | <i>TS-tr</i>    |                 |             | 0.040217     |  |  |
|                                                  | <i>G-tr</i>     |                 |             | -276.144319  |  |  |
|                                                  |                 | <i>TS-qh-tr</i> |             | 0.039379     |  |  |
|                                                  | <i>G-qh-tr</i>  |                 | -276.144829 |              |  |  |

|                                                |                                                                                                                                                                        |                                                                                                 |  |             |                                                                                                                                                       |  |
|------------------------------------------------|------------------------------------------------------------------------------------------------------------------------------------------------------------------------|-------------------------------------------------------------------------------------------------|--|-------------|-------------------------------------------------------------------------------------------------------------------------------------------------------|--|
| Heptane (M06/def2-TZVP)                        | <i>E</i>                                                                                                                                                               | -276.339778                                                                                     |  |             |                                                                                                                                                       |  |
| Heptane (MN15/def2-TZVP)                       | <i>E</i>                                                                                                                                                               | -276.106500                                                                                     |  |             |                                                                                                                                                       |  |
| Heptane (MN15/def2-TZVPD)                      | <i>E</i>                                                                                                                                                               | -276.108460                                                                                     |  |             |                                                                                                                                                       |  |
| Heptane (MP2/def2-TZVPD)                       | <i>E</i>                                                                                                                                                               | -275.704319                                                                                     |  |             |                                                                                                                                                       |  |
| Heptane (CCSD(T)//MP2/def2-TZVPD)              | <i>E</i>                                                                                                                                                               | -275.842818                                                                                     |  |             |                                                                                                                                                       |  |
| Mesitylene                                     | <i>E</i><br><i>H</i><br><i>H</i> -qh<br><i>TS</i><br><i>G</i><br><i>TS</i> -qh<br><i>G</i> -qh<br><i>TS</i> -tr<br><i>G</i> -tr<br><i>TS</i> -qh-tr<br><i>G</i> -qh-tr | -350.143455<br>-349.950809<br>-349.951408<br>0.042370<br>-349.993179<br>0.040628<br>-349.992036 |  |             | -350.145137<br>-349.950747<br>-349.952242<br>0.048179<br>-349.998926<br>0.044946<br>-349.997188<br>0.042861<br>-349.993608<br>0.039629<br>-349.991871 |  |
| Mesitylene (M06/def2-TZVP)                     | <i>E</i>                                                                                                                                                               | -350.155875                                                                                     |  |             |                                                                                                                                                       |  |
| Mesitylene (MN15/def2-TZVP)                    | <i>E</i>                                                                                                                                                               | -349.859958                                                                                     |  |             |                                                                                                                                                       |  |
| Mesitylene (MN15/def2-TZVPD)                   | <i>E</i>                                                                                                                                                               | -349.861784                                                                                     |  |             |                                                                                                                                                       |  |
| Mesitylene (MP2/def2-TZVPD)                    | <i>E</i>                                                                                                                                                               | -349.387240                                                                                     |  |             |                                                                                                                                                       |  |
| Mesitylene (CCSD(T)//MP2/def2-TZVPD)           | <i>E</i>                                                                                                                                                               | -349.517685                                                                                     |  |             |                                                                                                                                                       |  |
| Toluene                                        | <i>E</i><br><i>H</i><br><i>H</i> -qh<br><i>TS</i><br><i>G</i><br><i>TS</i> -qh<br><i>G</i> -qh<br><i>TS</i> -tr<br><i>G</i> -tr<br><i>TS</i> -qh-tr<br><i>G</i> -qh-tr | -271.524922<br>-271.389072<br>-271.389568<br>0.037584<br>-271.426656<br>0.036870<br>-271.426438 |  |             | -271.526601<br>-271.390868<br>-271.391367<br>0.037617<br>-271.428485<br>0.036878<br>-271.428245<br>0.032359<br>-271.423227<br>0.031620<br>-271.422987 |  |
| Toluene (M06/def2-TZVP)                        | <i>E</i>                                                                                                                                                               | -271.535022                                                                                     |  |             |                                                                                                                                                       |  |
| Toluene (MN15/def2-TZVP)                       | <i>E</i>                                                                                                                                                               | -271.305541                                                                                     |  |             |                                                                                                                                                       |  |
| Toluene (MN15/def2-TZVPD)                      | <i>E</i>                                                                                                                                                               | -271.306929                                                                                     |  |             |                                                                                                                                                       |  |
| Toluene (MP2/def2-TZVPD)                       | <i>E</i>                                                                                                                                                               | -270.942675                                                                                     |  |             |                                                                                                                                                       |  |
| Toluene (CCSD(T)//MP2/def2-TZVPD)              | <i>E</i>                                                                                                                                                               | -271.0382843                                                                                    |  |             |                                                                                                                                                       |  |
| Me <sub>3</sub> Al-benzene ( <i>T</i> = 313 K) | <i>E</i>                                                                                                                                                               | -594.368291                                                                                     |  | -594.370500 |                                                                                                                                                       |  |

|                                                      |                 |             |             |             |             |  |
|------------------------------------------------------|-----------------|-------------|-------------|-------------|-------------|--|
|                                                      | <i>H</i>        | -594.142304 | -594.144781 |             |             |  |
|                                                      | <i>H-qh</i>     | -594.144912 | -594.147352 |             |             |  |
|                                                      | <i>TS</i>       | 0.062281    | 0.061564    |             |             |  |
|                                                      | <i>G</i>        | -594.204585 | -594.206345 |             |             |  |
|                                                      | <i>TS-qh</i>    | 0.058816    | 0.058791    |             |             |  |
|                                                      | <i>G-qh</i>     | -594.203728 | -594.206143 |             |             |  |
|                                                      | <i>TS-tr</i>    |             | 0.056019    |             |             |  |
|                                                      | <i>G-tr</i>     |             | -594.200800 |             |             |  |
|                                                      | <i>TS-qh-tr</i> |             | 0.053247    |             |             |  |
|                                                      | <i>G-qh-tr</i>  |             | -594.200599 |             |             |  |
| Me <sub>3</sub> Al-benzene (M06/def2-TZVP)           | <i>E</i>        | -594.385921 |             |             |             |  |
| Me <sub>3</sub> Al-benzene (MN15/def2-TZVP)          | <i>E</i>        | -594.018618 |             |             |             |  |
| Me <sub>3</sub> Al-benzene (MN15/def2-TZVPD)         | <i>E</i>        | -594.020687 |             |             |             |  |
| Me <sub>3</sub> Al-benzene (MP2/def2-TZVPD)          | <i>E</i>        | -593.167093 |             |             |             |  |
| Me <sub>3</sub> Al-benzene (CCSD(T)//MP2/def2-TZVPD) | <i>E</i>        | -593.321819 |             |             |             |  |
| Me <sub>3</sub> Al-heptane                           | <i>E</i>        | -638.481341 |             | -638.482210 |             |  |
|                                                      | <i>H</i>        | -638.133447 |             | -638.134646 |             |  |
|                                                      | <i>H-qh</i>     | -638.137106 |             | -638.138271 |             |  |
|                                                      | <i>TS</i>       | 0.068838    |             | 0.068688    |             |  |
|                                                      | <i>G</i>        | -638.202285 |             | -638.203334 |             |  |
|                                                      | <i>TS-qh</i>    | 0.065466    |             | 0.065503    |             |  |
|                                                      | <i>G-qh</i>     | -638.202572 |             | -638.203774 |             |  |
|                                                      | <i>TS-tr</i>    |             |             | 0.063798    |             |  |
|                                                      | <i>G-tr</i>     |             |             | -638.198444 |             |  |
|                                                      | <i>TS-qh-tr</i> |             |             | 0.060613    |             |  |
|                                                      | <i>G-qh-tr</i>  |             |             | -638.198884 |             |  |
| Me <sub>3</sub> Al-heptane (M06/def2-TZVP)           | <i>E</i>        | -638.496173 |             |             |             |  |
| Me <sub>3</sub> Al-heptane (MN15/def2-TZVP)          | <i>E</i>        | -638.092529 |             |             |             |  |
| Me <sub>3</sub> Al-heptane (MN15/def2-TZVPD)         | <i>E</i>        | -638.095816 |             |             |             |  |
| Me <sub>3</sub> Al-heptane (MP2/def2-TZVPD)          | <i>E</i>        | -637.143914 |             |             |             |  |
| Me <sub>3</sub> Al-heptane (CCSD(T)//MP2/def2-TZVPD) | <i>E</i>        | -637.361100 |             |             |             |  |
| Me <sub>3</sub> Al-mesitylene                        | <i>E</i>        | -350.143455 |             |             | -350.145137 |  |
|                                                      | <i>H</i>        | -349.950809 |             |             | -349.950747 |  |
|                                                      | <i>H-qh</i>     | -349.951408 |             |             | -349.952242 |  |
|                                                      | <i>TS</i>       | 0.042370    |             |             | 0.048179    |  |
|                                                      | <i>G</i>        | -349.993179 |             |             | -349.998926 |  |
|                                                      | <i>TS-qh</i>    | 0.040628    |             |             | 0.044946    |  |
|                                                      | <i>G-qh</i>     | -349.992036 |             |             | -349.997188 |  |

|                                                              |                                                                                                                                                                        |                                                                                                 |                                                                                                 |  |                                                    |                                                                                                                                                       |
|--------------------------------------------------------------|------------------------------------------------------------------------------------------------------------------------------------------------------------------------|-------------------------------------------------------------------------------------------------|-------------------------------------------------------------------------------------------------|--|----------------------------------------------------|-------------------------------------------------------------------------------------------------------------------------------------------------------|
|                                                              | TS-tr<br>G-tr<br>TS-qh-tr<br>G-qh-tr                                                                                                                                   |                                                                                                 |                                                                                                 |  | 0.042861<br>-349.993608<br>0.039629<br>-349.991871 |                                                                                                                                                       |
| Me <sub>3</sub> Al-mesitylene (M06/def2-TZVP)                | <i>E</i>                                                                                                                                                               | -712.321536                                                                                     |                                                                                                 |  |                                                    |                                                                                                                                                       |
| Me <sub>3</sub> Al-mesitylene (MN15/def2-TZVP)               | <i>E</i>                                                                                                                                                               | -711.855495                                                                                     |                                                                                                 |  |                                                    |                                                                                                                                                       |
| Me <sub>3</sub> Al-mesitylene (MN15/def2-TZVPD)              | <i>E</i>                                                                                                                                                               | -711.858417                                                                                     |                                                                                                 |  |                                                    |                                                                                                                                                       |
| Me <sub>3</sub> Al-mesitylene (MP2/def2-TZVPD)               | <i>E</i>                                                                                                                                                               | -710.839719                                                                                     |                                                                                                 |  |                                                    |                                                                                                                                                       |
| Me <sub>3</sub> Al-mesitylene (CCSD(T)//MP2/def2-TZVPD)      | <i>E</i>                                                                                                                                                               | -711.045749                                                                                     |                                                                                                 |  |                                                    |                                                                                                                                                       |
| Me <sub>3</sub> Al-toluene                                   | <i>E</i><br><i>H</i><br><i>H</i> -qh<br><i>TS</i><br><i>G</i><br><i>TS</i> -qh<br><i>G</i> -qh<br><i>TS</i> -tr<br><i>G</i> -tr<br><i>TS</i> -qh-tr<br><i>G</i> -qh-tr | -633.679243<br>-633.424954<br>-633.427300<br>0.059442<br>-633.484396<br>0.057301<br>-633.484601 |                                                                                                 |  |                                                    | -633.681481<br>-633.427521<br>-633.429814<br>0.060451<br>-633.487972<br>0.057257<br>-633.487071<br>0.055193<br>-633.482714<br>0.051999<br>-633.481813 |
| Me <sub>3</sub> Al-toluene (M06/def2-TZVP)                   | <i>E</i>                                                                                                                                                               | -633.697900                                                                                     |                                                                                                 |  |                                                    |                                                                                                                                                       |
| Me <sub>3</sub> Al-toluene (MN15/def2-TZVP)                  | <i>E</i>                                                                                                                                                               | -633.297601                                                                                     |                                                                                                 |  |                                                    |                                                                                                                                                       |
| Me <sub>3</sub> Al-toluene (MN15/def2-TZVPD)                 | <i>E</i>                                                                                                                                                               | -633.300018                                                                                     |                                                                                                 |  |                                                    |                                                                                                                                                       |
| Me <sub>3</sub> Al-toluene (MP2/def2-TZVPD)                  | <i>E</i>                                                                                                                                                               | -632.391425                                                                                     |                                                                                                 |  |                                                    |                                                                                                                                                       |
| Me <sub>3</sub> Al-toluene (CCSD(T)//MP2/def2-TZVPD)         | <i>E</i>                                                                                                                                                               | -632.563298                                                                                     |                                                                                                 |  |                                                    |                                                                                                                                                       |
| Me <sub>6</sub> Al <sub>2</sub> -benzene ( <i>T</i> = 313 K) | <i>E</i><br><i>H</i><br><i>H</i> -qh<br><i>TS</i><br><i>G</i><br><i>TS</i> -qh<br><i>G</i> -qh<br><i>TS</i> -tr<br><i>G</i> -tr<br><i>TS</i> -qh-tr<br><i>G</i> -qh-tr | -956.536049<br>-956.190016<br>-956.194372<br>0.080861<br>-956.270877<br>0.077231<br>-956.271603 | -956.538353<br>-956.192744<br>-956.197109<br>0.080922<br>-956.273666<br>0.077295<br>-956.274404 |  |                                                    | 0.075378<br>-956.268122<br>0.071751<br>-956.268860                                                                                                    |
| Me <sub>6</sub> Al <sub>2</sub> -benzene (M06/def2-TZVP)     | <i>E</i>                                                                                                                                                               | -956.564156                                                                                     |                                                                                                 |  |                                                    |                                                                                                                                                       |
| Me <sub>6</sub> Al <sub>2</sub> -benzene (MN15/def2-TZVP)    | <i>E</i>                                                                                                                                                               | -956.024380                                                                                     |                                                                                                 |  |                                                    |                                                                                                                                                       |

|                                                                    |               |              |  |  |  |  |
|--------------------------------------------------------------------|---------------|--------------|--|--|--|--|
| Me <sub>6</sub> Al <sub>2</sub> -benzene (MN15/def2-TZVPD)         | <i>E</i>      | -956.027617  |  |  |  |  |
| Me <sub>6</sub> Al <sub>2</sub> -benzene (MP2/def2-TZVPD)          | <i>E</i>      | -954.629366  |  |  |  |  |
| Me <sub>6</sub> Al <sub>2</sub> -benzene (CCSD(T)//MP2/def2-TZVPD) | <i>E</i>      | -954.861881  |  |  |  |  |
| Me <sub>6</sub> Al <sub>2</sub> -heptane                           | <i>E</i>      | -1000.651400 |  |  |  |  |
|                                                                    | <i>H</i>      | -1000.184396 |  |  |  |  |
|                                                                    | <i>H</i> -qh  | -1000.189887 |  |  |  |  |
|                                                                    | <i>TS</i>     | 0.090568     |  |  |  |  |
|                                                                    | <i>G</i>      | -1000.274964 |  |  |  |  |
|                                                                    | <i>TS</i> -qh | 0.082358     |  |  |  |  |
|                                                                    | <i>G</i> -qh  | -1000.272245 |  |  |  |  |
| Me <sub>6</sub> Al <sub>2</sub> -mesitylene                        | <i>E</i>      | -1074.465892 |  |  |  |  |
|                                                                    | <i>H</i>      | -1074.033892 |  |  |  |  |
|                                                                    | <i>H</i> -qh  | -1074.039148 |  |  |  |  |
|                                                                    | <i>TS</i>     | 0.087792     |  |  |  |  |
|                                                                    | <i>G</i>      | -1074.121684 |  |  |  |  |
|                                                                    | <i>TS</i> -qh | 0.081778     |  |  |  |  |
|                                                                    | <i>G</i> -qh  | -1074.120926 |  |  |  |  |
| Me <sub>6</sub> Al <sub>2</sub> -toluene                           | <i>E</i>      | -995.846021  |  |  |  |  |
|                                                                    | <i>H</i>      | -995.472652  |  |  |  |  |
|                                                                    | <i>H</i> -qh  | -995.477094  |  |  |  |  |
|                                                                    | <i>TS</i>     | 0.079042     |  |  |  |  |
|                                                                    | <i>G</i>      | -995.551694  |  |  |  |  |
|                                                                    | <i>TS</i> -qh | 0.074840     |  |  |  |  |
|                                                                    | <i>G</i> -qh  | -995.551934  |  |  |  |  |
| Et <sub>3</sub> Al-heptane                                         | <i>E</i>      | -756.383013  |  |  |  |  |
|                                                                    | <i>H</i>      | -755.943565  |  |  |  |  |
|                                                                    | <i>H</i> -qh  | -755.948132  |  |  |  |  |
|                                                                    | <i>TS</i>     | 0.076715     |  |  |  |  |
|                                                                    | <i>G</i>      | -756.020280  |  |  |  |  |
|                                                                    | <i>TS</i> -qh | 0.072874     |  |  |  |  |
|                                                                    | <i>G</i> -qh  | -756.021006  |  |  |  |  |
| Et <sub>6</sub> Al <sub>2</sub> -heptane                           | <i>E</i>      | -1236.453901 |  |  |  |  |
|                                                                    | <i>H</i>      | -1235.803249 |  |  |  |  |
|                                                                    | <i>H</i> -qh  | -1235.809744 |  |  |  |  |
|                                                                    | <i>TS</i>     | 0.102016     |  |  |  |  |
|                                                                    | <i>G</i>      | -1235.905265 |  |  |  |  |
|                                                                    | <i>TS</i> -qh | 0.095591     |  |  |  |  |
|                                                                    | <i>G</i> -qh  | -1235.905335 |  |  |  |  |

|                                                               |                                                                                                |                                                                                                      |  |  |  |  |
|---------------------------------------------------------------|------------------------------------------------------------------------------------------------|------------------------------------------------------------------------------------------------------|--|--|--|--|
| i-Bu <sub>3</sub> Al-heptane                                  | <i>E</i><br><i>H</i><br><i>H</i> -qh<br><i>TS</i><br><i>G</i><br><i>TS</i> -qh<br><i>G</i> -qh | -992.230291<br>-991.612273<br>-991.618282<br>0.093602<br>-991.705875<br>0.086447<br>-991.704729      |  |  |  |  |
| i-Bu <sub>6</sub> Al <sub>2</sub> -heptane                    | <i>E</i><br><i>H</i><br><i>H</i> -qh<br><i>TS</i><br><i>G</i><br><i>TS</i> -qh<br><i>G</i> -qh | -1708.141965<br>-1707.133568<br>-1707.143364<br>0.132867<br>-1707.266435<br>0.123608<br>-1707.266972 |  |  |  |  |
| (Me <sub>3</sub> Al-benzene) <sub>2</sub> ( <i>T</i> = 313 K) | <i>E</i><br><i>H</i><br><i>H</i> -qh<br><i>TS</i><br><i>G</i><br><i>TS</i> -qh<br><i>G</i> -qh | -1188.758738<br>-1188.303567<br>-1188.312935<br>0.099441<br>-1188.403008<br>0.090808<br>-1188.403743 |  |  |  |  |
| (Me <sub>3</sub> Al-heptane) <sub>2</sub>                     | <i>E</i><br><i>H</i><br><i>H</i> -qh<br><i>TS</i><br><i>G</i><br><i>TS</i> -qh<br><i>G</i> -qh | -1512.794767<br>-1511.912530<br>-1511.922152<br>0.127851<br>-1512.040381<br>0.116948<br>-1512.039100 |  |  |  |  |
| (Me <sub>3</sub> Al-mesitylene) <sub>2</sub>                  | <i>E</i><br><i>H</i><br><i>H</i> -qh<br><i>TS</i><br><i>G</i><br><i>TS</i> -qh<br><i>G</i> -qh | -1424.618449<br>-1423.989984<br>-1423.998493<br>0.116355<br>-1424.106339<br>0.103389<br>-1424.101882 |  |  |  |  |
| (Me <sub>3</sub> Al-toluene) <sub>2</sub>                     | <i>E</i><br><i>H</i><br><i>H</i> -qh                                                           | -1267.378641<br>-1266.867330<br>-1266.874396                                                         |  |  |  |  |

|                                                                                                      |                 |              |              |  |  |  |
|------------------------------------------------------------------------------------------------------|-----------------|--------------|--------------|--|--|--|
|                                                                                                      | <i>TS</i>       | 0.099647     |              |  |  |  |
|                                                                                                      | <i>G</i>        | -1266.966977 |              |  |  |  |
|                                                                                                      | <i>TS-qh</i>    | 0.089863     |              |  |  |  |
|                                                                                                      | <i>G-qh</i>     | -1266.964259 |              |  |  |  |
| (Et <sub>3</sub> Al-heptane) <sub>2</sub>                                                            | <i>E</i>        | -1512.794767 |              |  |  |  |
|                                                                                                      | <i>H</i>        | -1511.912530 |              |  |  |  |
|                                                                                                      | <i>H-qh</i>     | -1511.922152 |              |  |  |  |
|                                                                                                      | <i>TS</i>       | 0.127851     |              |  |  |  |
|                                                                                                      | <i>G</i>        | -1512.040381 |              |  |  |  |
|                                                                                                      | <i>TS-qh</i>    | 0.116948     |              |  |  |  |
|                                                                                                      | <i>G-qh</i>     | -1512.039100 |              |  |  |  |
| (i-Bu <sub>3</sub> Al-heptane) <sub>2</sub>                                                          | <i>E</i>        | -1984.483316 |              |  |  |  |
|                                                                                                      | <i>H</i>        | -1983.242980 |              |  |  |  |
|                                                                                                      | <i>H-qh</i>     | -1983.254679 |              |  |  |  |
|                                                                                                      | <i>TS</i>       | 0.156612     |              |  |  |  |
|                                                                                                      | <i>G</i>        | -1983.399592 |              |  |  |  |
|                                                                                                      | <i>TS-qh</i>    | 0.142717     |              |  |  |  |
|                                                                                                      | <i>G-qh</i>     | -1983.397396 |              |  |  |  |
| [Cp <sub>2</sub> ZrMe][B(C <sub>6</sub> F <sub>5</sub> ) <sub>4</sub> ] isomer 1 ( <i>T</i> = 313 K) | <i>E</i>        | -3410.201182 | -3410.211602 |  |  |  |
|                                                                                                      | <i>H</i>        | -3409.729552 | -3409.740328 |  |  |  |
|                                                                                                      | <i>H-qh</i>     | -3409.738827 | -3409.749674 |  |  |  |
|                                                                                                      | <i>TS</i>       | 0.147596     | 0.148374     |  |  |  |
|                                                                                                      | <i>G</i>        | -3409.877148 | -3409.888702 |  |  |  |
|                                                                                                      | <i>TS-qh</i>    | 0.136379     | 0.136408     |  |  |  |
|                                                                                                      | <i>G-qh</i>     | -3409.875206 | -3409.886082 |  |  |  |
|                                                                                                      | <i>TS-tr</i>    |              | 0.142829     |  |  |  |
|                                                                                                      | <i>G-tr</i>     |              | -3409.883157 |  |  |  |
|                                                                                                      | <i>TS-qh-tr</i> |              | 0.130864     |  |  |  |
|                                                                                                      | <i>G-qh-tr</i>  |              | -3409.880538 |  |  |  |
| [Cp <sub>2</sub> ZrMe][B(C <sub>6</sub> F <sub>5</sub> ) <sub>4</sub> ] isomer 2 ( <i>T</i> = 313 K) | <i>E</i>        | -3410.203116 | -3410.213389 |  |  |  |
|                                                                                                      | <i>H</i>        | -3409.730942 | -3409.741624 |  |  |  |
|                                                                                                      | <i>H-qh</i>     | -3409.739760 | -3409.750529 |  |  |  |
|                                                                                                      | <i>TS</i>       | 0.145922     | 0.146382     |  |  |  |
|                                                                                                      | <i>G</i>        | -3409.876864 | -3409.888006 |  |  |  |
|                                                                                                      | <i>TS-qh</i>    | 0.135101     | 0.135274     |  |  |  |
|                                                                                                      | <i>G-qh</i>     | -3409.874861 | -3409.885803 |  |  |  |
|                                                                                                      | <i>TS-tr</i>    |              | 0.140837     |  |  |  |
|                                                                                                      | <i>G-tr</i>     |              | -3409.882461 |  |  |  |

|                                                                                                                                      |                                                                                                                                                                 |                                                                                                                                                                  |                                                                                                                                                                  |  |  |  |
|--------------------------------------------------------------------------------------------------------------------------------------|-----------------------------------------------------------------------------------------------------------------------------------------------------------------|------------------------------------------------------------------------------------------------------------------------------------------------------------------|------------------------------------------------------------------------------------------------------------------------------------------------------------------|--|--|--|
|                                                                                                                                      | <i>TS-qh-tr</i><br><i>G-qh-tr</i>                                                                                                                               |                                                                                                                                                                  | 0.129730<br>-3409.880259                                                                                                                                         |  |  |  |
| [Cp <sub>2</sub> ZrMe][B(C <sub>6</sub> F <sub>5</sub> ) <sub>4</sub> ] isomer 3 ( <i>T</i> = 313 K)                                 | <i>E</i><br><i>H</i><br><i>H-qh</i><br><i>TS</i><br><i>G</i><br><i>TS-qh</i><br><i>G-qh</i><br><i>TS-tr</i><br><i>G-tr</i><br><i>TS-qh-tr</i><br><i>G-qh-tr</i> | -3410.199163<br>-3409.727241<br>-3409.736319<br>0.148202<br>-3409.875443<br>0.135515<br>-3409.871834<br><br>0.142490<br>-3409.880917<br>0.130073<br>-3409.877575 | -3410.210018<br>-3409.738427<br>-3409.747502<br>0.148035<br>-3409.886462<br>0.135617<br>-3409.883119<br><br>0.142490<br>-3409.880917<br>0.130073<br>-3409.877575 |  |  |  |
| [Cp <sub>2</sub> ZrMe][B(C <sub>6</sub> F <sub>5</sub> ) <sub>4</sub> ] isomer 4 ( <i>T</i> = 313 K)                                 | <i>E</i><br><i>H</i><br><i>H-qh</i><br><i>TS</i><br><i>G</i><br><i>TS-qh</i><br><i>G-qh</i><br><i>TS-tr</i><br><i>G-tr</i><br><i>TS-qh-tr</i><br><i>G-qh-tr</i> | -3410.200777<br>-3409.728246<br>-3409.737024<br>0.145370<br>-3409.873616<br>0.134551<br>-3409.871575<br><br>0.140142<br>-3409.878046<br>0.129137<br>-3409.875877 | -3410.210041<br>-3409.737904<br>-3409.746740<br>0.145686<br>-3409.883590<br>0.134681<br>-3409.881421<br><br>0.140142<br>-3409.878046<br>0.129137<br>-3409.875877 |  |  |  |
| [Cp <sub>2</sub> ZrMe][B(C <sub>6</sub> F <sub>5</sub> ) <sub>4</sub> ] isomer 5 ( <i>T</i> = 313 K)                                 | <i>E</i><br><i>H</i><br><i>H-qh</i><br><i>TS</i><br><i>G</i><br><i>TS-qh</i><br><i>G-qh</i><br><i>TS-tr</i><br><i>G-tr</i><br><i>TS-qh-tr</i><br><i>G-qh-tr</i> | -3410.200298<br>-3409.727905<br>-3409.736697<br>0.145856<br>-3409.873761<br>0.134789<br>-3409.871486<br><br>0.140406<br>-3409.878049<br>0.129311<br>-3409.875780 | -3410.209686<br>-3409.737643<br>-3409.746469<br>0.145951<br>-3409.883594<br>0.134856<br>-3409.881325<br><br>0.140406<br>-3409.878049<br>0.129311<br>-3409.875780 |  |  |  |
| [Cp <sub>2</sub> ZrMe <sub>2</sub> AlMe <sub>2</sub> ][B(C <sub>6</sub> F <sub>5</sub> ) <sub>4</sub> ] isomer 1 ( <i>T</i> = 313 K) | <i>E</i><br><i>H</i><br><i>H-qh</i>                                                                                                                             | -3772.369627<br>-3771.778479<br>-3771.789782                                                                                                                     | -3772.383610<br>-3771.792988<br>-3771.804345                                                                                                                     |  |  |  |

|                                                                                                                                      |                                                                                                                                                                 |                                                                                                                                  |                                                                                                                                                              |  |  |  |
|--------------------------------------------------------------------------------------------------------------------------------------|-----------------------------------------------------------------------------------------------------------------------------------------------------------------|----------------------------------------------------------------------------------------------------------------------------------|--------------------------------------------------------------------------------------------------------------------------------------------------------------|--|--|--|
|                                                                                                                                      | <i>TS</i><br><i>G</i><br><i>TS-qh</i><br><i>G-qh</i><br><i>TS-tr</i><br><i>G-tr</i><br><i>TS-qh-tr</i><br><i>G-qh-tr</i>                                        | 0.168107<br>-3771.946586<br>0.153477<br>-3771.943259<br><br><br><br><br><br><br>                                                 | 0.168695<br>-3771.961683<br>0.153541<br>-3771.957886<br>0.163150<br>-3771.956138<br>0.147996<br>-3771.952341                                                 |  |  |  |
| [Cp <sub>2</sub> ZrMe <sub>2</sub> AlMe <sub>2</sub> ][B(C <sub>6</sub> F <sub>5</sub> ) <sub>4</sub> ] isomer 2 ( <i>T</i> = 313 K) | <i>E</i><br><i>H</i><br><i>H-qh</i><br><i>TS</i><br><i>G</i><br><i>TS-qh</i><br><i>G-qh</i><br><i>TS-tr</i><br><i>G-tr</i><br><i>TS-qh-tr</i><br><i>G-qh-tr</i> | -3772.368043<br>-3771.776705<br>-3771.787934<br>0.167991<br>-3771.944696<br>0.153328<br>-3771.941262<br><br><br><br><br><br><br> | -3772.383212<br>-3771.792438<br>-3771.803870<br>0.169310<br>-3771.961748<br>0.153575<br>-3771.957445<br>0.163766<br>-3771.956204<br>0.148031<br>-3771.951901 |  |  |  |
| [Cp <sub>2</sub> ZrMe <sub>2</sub> AlMe <sub>2</sub> ][B(C <sub>6</sub> F <sub>5</sub> ) <sub>4</sub> ] isomer 3 ( <i>T</i> = 313 K) | <i>E</i><br><i>H</i><br><i>H-qh</i><br><i>TS</i><br><i>G</i><br><i>TS-qh</i><br><i>G-qh</i><br><i>TS-tr</i><br><i>G-tr</i><br><i>TS-qh-tr</i><br><i>G-qh-tr</i> | -3772.369398<br>-3771.778193<br>-3771.789352<br>0.168087<br>-3771.946280<br>0.153202<br>-3771.942554<br><br><br><br><br><br><br> | -3772.383153<br>-3771.792477<br>-3771.803706<br>0.168243<br>-3771.960720<br>0.153325<br>-3771.957031<br>0.162699<br>-3771.955176<br>0.147781<br>-3771.951487 |  |  |  |
| [Cp <sub>2</sub> ZrMe <sub>2</sub> AlMe <sub>2</sub> ][B(C <sub>6</sub> F <sub>5</sub> ) <sub>4</sub> ] isomer 4 ( <i>T</i> = 313 K) | <i>E</i><br><i>H</i><br><i>H-qh</i><br><i>TS</i><br><i>G</i><br><i>TS-qh</i><br><i>G-qh</i><br><i>TS-tr</i>                                                     | -3772.368183<br>-3771.777003<br>-3771.788298<br>0.168711<br>-3771.945714<br>0.153200<br>-3771.941498<br><br>                     | -3772.382135<br>-3771.791380<br>-3771.802783<br>0.168957<br>-3771.960337<br>0.153491<br>-3771.956274<br>0.163413                                             |  |  |  |

|                                                                                                                              |                                                                                    |                                                                                                      |                                                                                                                                                              |  |  |  |
|------------------------------------------------------------------------------------------------------------------------------|------------------------------------------------------------------------------------|------------------------------------------------------------------------------------------------------|--------------------------------------------------------------------------------------------------------------------------------------------------------------|--|--|--|
|                                                                                                                              | G-tr<br>TS-qh-tr<br>G-qh-tr                                                        |                                                                                                      | -3771.954793<br>0.147947<br>-3771.950730                                                                                                                     |  |  |  |
| [Cp <sub>2</sub> ZrMe <sub>2</sub> AlMe <sub>2</sub> ][B(C <sub>6</sub> F <sub>5</sub> ) <sub>4</sub> ] isomer 5 (T = 313 K) | E<br>H<br>H-qh<br>TS<br>G<br>TS-qh<br>G-qh<br>TS-tr<br>G-tr<br>TS-qh-tr<br>G-qh-tr | -3772.367472<br>-3771.775967<br>-3771.787214<br>0.168821<br>-3771.944788<br>0.153525<br>-3771.940739 | -3772.382018<br>-3771.790958<br>-3771.802288<br>0.169856<br>-3771.960814<br>0.153614<br>-3771.955902<br>0.164311<br>-3771.955269<br>0.148069<br>-3771.950357 |  |  |  |
| [Cp <sub>2</sub> ZrMe <sub>2</sub> AlMe <sub>2</sub> ][B(C <sub>6</sub> F <sub>5</sub> ) <sub>4</sub> ] isomer 6 (T = 313 K) | E<br>H<br>H-qh<br>TS<br>G<br>TS-qh<br>G-qh<br>TS-tr<br>G-tr<br>TS-qh-tr<br>G-qh-tr | -3772.367491<br>-3771.775921<br>-3771.787092<br>0.168521<br>-3771.944442<br>0.153440<br>-3771.940532 | -3772.382039<br>-3771.791016<br>-3771.802288<br>0.169000<br>-3771.960016<br>0.153533<br>-3771.955821<br>0.163455<br>-3771.954471<br>0.147989<br>-3771.950277 |  |  |  |
| [Cp <sub>2</sub> ZrMe <sub>2</sub> AlMe <sub>2</sub> ][B(C <sub>6</sub> F <sub>5</sub> ) <sub>4</sub> ] isomer 7 (T = 313 K) | E<br>H<br>H-qh<br>TS<br>G<br>TS-qh<br>G-qh<br>TS-tr<br>G-tr<br>TS-qh-tr<br>G-qh-tr | -3772.363673<br>-3771.772368<br>-3771.783495<br>0.168460<br>-3771.940828<br>0.152860<br>-3771.936355 | -3772.379632<br>-3771.789014<br>-3771.800485<br>0.171502<br>-3771.960516<br>0.153620<br>-3771.954105<br>0.165957<br>-3771.954971<br>0.148075<br>-3771.948560 |  |  |  |
| [Cp <sub>2</sub> ZrMe <sub>2</sub> AlMe <sub>2</sub> ][B(C <sub>6</sub> F <sub>5</sub> ) <sub>4</sub> ] isomer 8 (T = 313 K) | E<br>H                                                                             | -3772.363777<br>-3771.772226                                                                         | -3772.379656<br>-3771.788584                                                                                                                                 |  |  |  |



|                                                                                                                                                       |                 |              |              |  |  |  |
|-------------------------------------------------------------------------------------------------------------------------------------------------------|-----------------|--------------|--------------|--|--|--|
|                                                                                                                                                       | <i>TS-tr</i>    |              | 0.149514     |  |  |  |
|                                                                                                                                                       | <i>G-tr</i>     |              | -3526.540172 |  |  |  |
|                                                                                                                                                       | <i>TS-qh-tr</i> |              | 0.135247     |  |  |  |
|                                                                                                                                                       | <i>G-qh-tr</i>  |              | -3526.535255 |  |  |  |
| [Me <sub>2</sub> CCp <sub>2</sub> ZrMe][B(C <sub>6</sub> F <sub>5</sub> ) <sub>4</sub> ] isomer 3 ( <i>T</i> = 313 K)                                 | <i>E</i>        | -3526.922491 | -3526.932405 |  |  |  |
|                                                                                                                                                       | <i>H</i>        | -3526.383985 | -3526.394334 |  |  |  |
|                                                                                                                                                       | <i>H-qh</i>     | -3526.392919 | -3526.403337 |  |  |  |
|                                                                                                                                                       | <i>TS</i>       | 0.152329     | 0.152951     |  |  |  |
|                                                                                                                                                       | <i>G</i>        | -3526.536314 | -3526.547285 |  |  |  |
|                                                                                                                                                       | <i>TS-qh</i>    | 0.140200     | 0.140365     |  |  |  |
|                                                                                                                                                       | <i>G-qh</i>     | -3526.533119 | -3526.543702 |  |  |  |
|                                                                                                                                                       | <i>TS-tr</i>    |              | 0.147406     |  |  |  |
|                                                                                                                                                       | <i>G-tr</i>     |              | -3526.541740 |  |  |  |
|                                                                                                                                                       | <i>TS-qh-tr</i> |              | 0.134820     |  |  |  |
|                                                                                                                                                       | <i>G-qh-tr</i>  |              | -3526.538157 |  |  |  |
| [Me <sub>2</sub> CCp <sub>2</sub> ZrMe <sub>2</sub> AlMe <sub>2</sub> ][B(C <sub>6</sub> F <sub>5</sub> ) <sub>4</sub> ] isomer 1 ( <i>T</i> = 313 K) | <i>E</i>        | -3889.086837 | -3889.101482 |  |  |  |
|                                                                                                                                                       | <i>H</i>        | -3888.429211 | -3888.444300 |  |  |  |
|                                                                                                                                                       | <i>H-qh</i>     | -3888.440308 | -3888.455345 |  |  |  |
|                                                                                                                                                       | <i>TS</i>       | 0.173804     | 0.173476     |  |  |  |
|                                                                                                                                                       | <i>G</i>        | -3888.603015 | -3888.617776 |  |  |  |
|                                                                                                                                                       | <i>TS-qh</i>    | 0.157957     | 0.158125     |  |  |  |
|                                                                                                                                                       | <i>G-qh</i>     | -3888.598265 | -3888.613470 |  |  |  |
|                                                                                                                                                       | <i>TS-tr</i>    |              | 0.167932     |  |  |  |
|                                                                                                                                                       | <i>G-tr</i>     |              | -3888.612232 |  |  |  |
|                                                                                                                                                       | <i>TS-qh-tr</i> |              | 0.152581     |  |  |  |
|                                                                                                                                                       | <i>G-qh-tr</i>  |              | -3888.607926 |  |  |  |
| [Me <sub>2</sub> CCp <sub>2</sub> ZrMe <sub>2</sub> AlMe <sub>2</sub> ][B(C <sub>6</sub> F <sub>5</sub> ) <sub>4</sub> ] isomer 2 ( <i>T</i> = 313 K) | <i>E</i>        | -3889.085566 | -3889.100238 |  |  |  |
|                                                                                                                                                       | <i>H</i>        | -3888.427845 | -3888.443007 |  |  |  |
|                                                                                                                                                       | <i>H-qh</i>     | -3888.439139 | -3888.454423 |  |  |  |
|                                                                                                                                                       | <i>TS</i>       | 0.173837     | 0.174316     |  |  |  |
|                                                                                                                                                       | <i>G</i>        | -3888.601682 | -3888.617323 |  |  |  |
|                                                                                                                                                       | <i>TS-qh</i>    | 0.158588     | 0.158720     |  |  |  |
|                                                                                                                                                       | <i>G-qh</i>     | -3888.597727 | -3888.613143 |  |  |  |
|                                                                                                                                                       | <i>TS-tr</i>    |              | 0.168772     |  |  |  |
|                                                                                                                                                       | <i>G-tr</i>     |              | -3888.611779 |  |  |  |
|                                                                                                                                                       | <i>TS-qh-tr</i> |              | 0.153176     |  |  |  |
|                                                                                                                                                       | <i>G-qh-tr</i>  |              | -3888.607599 |  |  |  |
| [Me <sub>2</sub> CCp <sub>2</sub> ZrMe <sub>2</sub> AlMe <sub>2</sub> ][B(C <sub>6</sub> F <sub>5</sub> ) <sub>4</sub> ] isomer 3 ( <i>T</i> = 313 K) | <i>E</i>        | -3889.085126 | -3889.099036 |  |  |  |

|                                                                                                                                                      |                 |              |              |  |  |  |
|------------------------------------------------------------------------------------------------------------------------------------------------------|-----------------|--------------|--------------|--|--|--|
|                                                                                                                                                      | <i>H</i>        | -3888.427649 | -3888.442087 |  |  |  |
|                                                                                                                                                      | <i>H-qh</i>     | -3888.438972 | -3888.453400 |  |  |  |
|                                                                                                                                                      | <i>TS</i>       | 0.173629     | 0.174119     |  |  |  |
|                                                                                                                                                      | <i>G</i>        | -3888.601278 | -3888.616206 |  |  |  |
|                                                                                                                                                      | <i>TS-qh</i>    | 0.158759     | 0.158859     |  |  |  |
|                                                                                                                                                      | <i>G-qh</i>     | -3888.597731 | -3888.612259 |  |  |  |
|                                                                                                                                                      | <i>TS-tr</i>    |              | 0.168575     |  |  |  |
|                                                                                                                                                      | <i>G-tr</i>     |              | -3888.610662 |  |  |  |
|                                                                                                                                                      | <i>TS-qh-tr</i> |              | 0.153315     |  |  |  |
|                                                                                                                                                      | <i>G-qh-tr</i>  |              | -3888.606715 |  |  |  |
| [Me <sub>2</sub> Cp <sub>2</sub> ZrMe <sub>2</sub> AlMe <sub>2</sub> ][B(C <sub>6</sub> F <sub>5</sub> ) <sub>4</sub> ] isomer 4 ( <i>T</i> = 313 K) | <i>E</i>        | -3889.082947 | -3889.099184 |  |  |  |
|                                                                                                                                                      | <i>H</i>        | -3888.425579 | -3888.442067 |  |  |  |
|                                                                                                                                                      | <i>H-qh</i>     | -3888.437191 | -3888.453157 |  |  |  |
|                                                                                                                                                      | <i>TS</i>       | 0.177441     | 0.174210     |  |  |  |
|                                                                                                                                                      | <i>G</i>        | -3888.603020 | -3888.616277 |  |  |  |
|                                                                                                                                                      | <i>TS-qh</i>    | 0.159653     | 0.158350     |  |  |  |
|                                                                                                                                                      | <i>G-qh</i>     | -3888.596844 | -3888.611507 |  |  |  |
|                                                                                                                                                      | <i>TS-tr</i>    |              | 0.168665     |  |  |  |
|                                                                                                                                                      | <i>G-tr</i>     |              | -3888.610732 |  |  |  |
|                                                                                                                                                      | <i>TS-qh-tr</i> |              | 0.152806     |  |  |  |
|                                                                                                                                                      | <i>G-qh-tr</i>  |              | -3888.605963 |  |  |  |
| [Me <sub>2</sub> Cp <sub>2</sub> ZrMe <sub>2</sub> AlMe <sub>2</sub> ][B(C <sub>6</sub> F <sub>5</sub> ) <sub>4</sub> ] isomer 5 ( <i>T</i> = 313 K) | <i>E</i>        | -3889.084019 | -3889.099257 |  |  |  |
|                                                                                                                                                      | <i>H</i>        | -3888.426561 | -3888.442090 |  |  |  |
|                                                                                                                                                      | <i>H-qh</i>     | -3888.437637 | -3888.453134 |  |  |  |
|                                                                                                                                                      | <i>TS</i>       | 0.174149     | 0.173858     |  |  |  |
|                                                                                                                                                      | <i>G</i>        | -3888.600710 | -3888.615948 |  |  |  |
|                                                                                                                                                      | <i>TS-qh</i>    | 0.158367     | 0.158191     |  |  |  |
|                                                                                                                                                      | <i>G-qh</i>     | -3888.596004 | -3888.611325 |  |  |  |
|                                                                                                                                                      | <i>TS-tr</i>    |              | 0.168314     |  |  |  |
|                                                                                                                                                      | <i>G-tr</i>     |              | -3888.610404 |  |  |  |
|                                                                                                                                                      | <i>TS-qh-tr</i> |              | 0.152646     |  |  |  |
|                                                                                                                                                      | <i>G-qh-tr</i>  |              | -3888.605780 |  |  |  |
| [Me <sub>2</sub> Cp <sub>2</sub> ZrMe <sub>2</sub> AlMe <sub>2</sub> ][B(C <sub>6</sub> F <sub>5</sub> ) <sub>4</sub> ] isomer 6 ( <i>T</i> = 313 K) | <i>E</i>        | -3889.084153 | -3889.098768 |  |  |  |
|                                                                                                                                                      | <i>H</i>        | -3888.426780 | -3888.441836 |  |  |  |
|                                                                                                                                                      | <i>H-qh</i>     | -3888.438110 | -3888.452993 |  |  |  |
|                                                                                                                                                      | <i>TS</i>       | 0.174284     | 0.173975     |  |  |  |
|                                                                                                                                                      | <i>G</i>        | -3888.601064 | -3888.615811 |  |  |  |
|                                                                                                                                                      | <i>TS-qh</i>    | 0.158586     | 0.158194     |  |  |  |

|                                                                                                                                               |                                                                                    |                                                                                                      |                                                                                                                                                              |  |  |  |
|-----------------------------------------------------------------------------------------------------------------------------------------------|------------------------------------------------------------------------------------|------------------------------------------------------------------------------------------------------|--------------------------------------------------------------------------------------------------------------------------------------------------------------|--|--|--|
|                                                                                                                                               | G-qh<br>TS-tr<br>G-tr<br>TS-qh-tr<br>G-qh-tr                                       | -3888.596696                                                                                         | -3888.611187<br>0.168431<br>-3888.610267<br>0.152650<br>-3888.605643                                                                                         |  |  |  |
| [Me <sub>2</sub> CCp <sub>2</sub> ZrMe <sub>2</sub> AlMe <sub>2</sub> ][B(C <sub>6</sub> F <sub>5</sub> ) <sub>4</sub> ] isomer 7 (T = 313 K) | E<br>H<br>H-qh<br>TS<br>G<br>TS-qh<br>G-qh<br>TS-tr<br>G-tr<br>TS-qh-tr<br>G-qh-tr | -3889.083016<br>-3888.425670<br>-3888.436971<br>0.175732<br>-3888.601402<br>0.158639<br>-3888.595610 | -3889.097556<br>-3888.440715<br>-3888.452049<br>0.175813<br>-3888.616528<br>0.158859<br>-3888.610908<br>0.170268<br>-3888.610983<br>0.153314<br>-3888.605363 |  |  |  |
| [Me <sub>2</sub> CCp <sub>2</sub> ZrMe <sub>2</sub> AlMe <sub>2</sub> ][B(C <sub>6</sub> F <sub>5</sub> ) <sub>4</sub> ] isomer 8 (T = 313 K) | E<br>H<br>H-qh<br>TS<br>G<br>TS-qh<br>G-qh<br>TS-tr<br>G-tr<br>TS-qh-tr<br>G-qh-tr | -3889.083946<br>-3888.426237<br>-3888.437191<br>0.172974<br>-3888.599211<br>0.157936<br>-3888.595127 | -3889.097570<br>-3888.440534<br>-3888.451656<br>0.174854<br>-3888.615388<br>0.158352<br>-3888.610008<br>0.169309<br>-3888.609843<br>0.152808<br>-3888.604464 |  |  |  |
| [EBiZrMe][B(C <sub>6</sub> F <sub>5</sub> ) <sub>4</sub> ] isomer 1 backward (T = 313 K)                                                      | E<br>H<br>H-qh<br>TS<br>G<br>TS-qh<br>G-qh<br>TS-tr<br>G-tr<br>TS-qh-tr<br>G-qh-tr | -3794.870826<br>-3794.260997<br>-3794.270840<br>0.161146<br>-3794.422143<br>0.148033<br>-3794.418873 | -3794.881274<br>-3794.271840<br>-3794.281784<br>0.162198<br>-3794.434038<br>0.148207<br>-3794.429991<br>0.156654<br>-3794.428494<br>0.142662<br>-3794.424446 |  |  |  |

|                                                                                                  |                                                                                                                                                                        |                                                                                                                                                                  |                                                                                                                                                                  |  |  |  |
|--------------------------------------------------------------------------------------------------|------------------------------------------------------------------------------------------------------------------------------------------------------------------------|------------------------------------------------------------------------------------------------------------------------------------------------------------------|------------------------------------------------------------------------------------------------------------------------------------------------------------------|--|--|--|
| [EBIZrMe][B(C <sub>6</sub> F <sub>5</sub> ) <sub>4</sub> ] isomer 2 forward ( <i>T</i> = 313 K)  | <i>E</i><br><i>H</i><br><i>H</i> -qh<br><i>TS</i><br><i>G</i><br><i>TS</i> -qh<br><i>G</i> -qh<br><i>TS</i> -tr<br><i>G</i> -tr<br><i>TS</i> -qh-tr<br><i>G</i> -qh-tr | -3794.869530<br>-3794.259810<br>-3794.269530<br>0.160299<br>-3794.420109<br>0.147856<br>-3794.417386<br><br>0.155207<br>-3794.426630<br>0.142338<br>-3794.423514 | -3794.880777<br>-3794.271423<br>-3794.281176<br>0.160751<br>-3794.432174<br>0.147882<br>-3794.429058<br><br>0.155207<br>-3794.426630<br>0.142338<br>-3794.423514 |  |  |  |
| [EBIZrMe][B(C <sub>6</sub> F <sub>5</sub> ) <sub>4</sub> ] isomer 3 forward ( <i>T</i> = 313 K)  | <i>E</i><br><i>H</i><br><i>H</i> -qh<br><i>TS</i><br><i>G</i><br><i>TS</i> -qh<br><i>G</i> -qh<br><i>TS</i> -tr<br><i>G</i> -tr<br><i>TS</i> -qh-tr<br><i>G</i> -qh-tr | -3794.865084<br>-3794.255159<br>-3794.264737<br>0.159643<br>-3794.414802<br>0.147298<br>-3794.412035<br><br>0.154953<br>-3794.426495<br>0.142055<br>-3794.423399 | -3794.881431<br>-3794.271542<br>-3794.281344<br>0.160497<br>-3794.432039<br>0.147600<br>-3794.428944<br><br>0.154953<br>-3794.426495<br>0.142055<br>-3794.423399 |  |  |  |
| [EBIZrMe][B(C <sub>6</sub> F <sub>5</sub> ) <sub>4</sub> ] isomer 4 forward ( <i>T</i> = 313 K)  | <i>E</i><br><i>H</i><br><i>H</i> -qh<br><i>TS</i><br><i>G</i><br><i>TS</i> -qh<br><i>G</i> -qh<br><i>TS</i> -tr<br><i>G</i> -tr<br><i>TS</i> -qh-tr<br><i>G</i> -qh-tr | -3794.872858<br>-3794.262317<br>-3794.271859<br>0.158009<br>-3794.420326<br>0.146861<br>-3794.418720<br><br>0.152721<br>-3794.425096<br>0.141428<br>-3794.423375 | -3794.882543<br>-3794.272375<br>-3794.281947<br>0.158265<br>-3794.430640<br>0.146972<br>-3794.428919<br><br>0.152721<br>-3794.425096<br>0.141428<br>-3794.423375 |  |  |  |
| [EBIZrMe][B(C <sub>6</sub> F <sub>5</sub> ) <sub>4</sub> ] isomer 5 backward ( <i>T</i> = 313 K) | <i>E</i><br><i>H</i><br><i>H</i> -qh<br><i>TS</i><br><i>G</i>                                                                                                          | -3794.869815<br>-3794.259976<br>-3794.269769<br>0.161349<br>-3794.421325                                                                                         | -3794.880822<br>-3794.271289<br>-3794.281111<br>0.161428<br>-3794.432717                                                                                         |  |  |  |

|                                                                                                                                  |                                                                                                                                                                 |                                                                                                      |                                                                                                                                                              |  |  |  |
|----------------------------------------------------------------------------------------------------------------------------------|-----------------------------------------------------------------------------------------------------------------------------------------------------------------|------------------------------------------------------------------------------------------------------|--------------------------------------------------------------------------------------------------------------------------------------------------------------|--|--|--|
|                                                                                                                                  | <i>TS-qh</i><br><i>G-qh</i><br><i>TS-tr</i><br><i>G-tr</i><br><i>TS-qh-tr</i><br><i>G-qh-tr</i>                                                                 | 0.147672<br>-3794.417441                                                                             | 0.147790<br>-3794.428901<br>0.155884<br>-3794.427173<br>0.142246<br>-3794.423357                                                                             |  |  |  |
| [EBIZrMe][B(C <sub>6</sub> F <sub>5</sub> ) <sub>4</sub> ] isomer 6 backward ( <i>T</i> = 313 K)                                 | <i>E</i><br><i>H</i><br><i>H-qh</i><br><i>TS</i><br><i>G</i><br><i>TS-qh</i><br><i>G-qh</i><br><i>TS-tr</i><br><i>G-tr</i><br><i>TS-qh-tr</i><br><i>G-qh-tr</i> | -3794.868805<br>-3794.259215<br>-3794.269079<br>0.162928<br>-3794.422143<br>0.147963<br>-3794.417042 | -3794.880796<br>-3794.271264<br>-3794.281078<br>0.161339<br>-3794.432603<br>0.147774<br>-3794.428852<br>0.155794<br>-3794.427058<br>0.142230<br>-3794.423308 |  |  |  |
| [EBIZrMe][B(C <sub>6</sub> F <sub>5</sub> ) <sub>4</sub> ] isomer 7 backward ( <i>T</i> = 313 K)                                 | <i>E</i><br><i>H</i><br><i>H-qh</i><br><i>TS</i><br><i>G</i><br><i>TS-qh</i><br><i>G-qh</i><br><i>TS-tr</i><br><i>G-tr</i><br><i>TS-qh-tr</i><br><i>G-qh-tr</i> | -3794.868751<br>-3794.258730<br>-3794.268530<br>0.160010<br>-3794.418740<br>0.147995<br>-3794.416525 | -3794.878927<br>-3794.269302<br>-3794.279143<br>0.160345<br>-3794.429647<br>0.148188<br>-3794.427331<br>0.154800<br>-3794.424102<br>0.142644<br>-3794.421787 |  |  |  |
| [EBIZrMe <sub>2</sub> AlMe <sub>2</sub> ][B(C <sub>6</sub> F <sub>5</sub> ) <sub>4</sub> ] isomer 1 backward ( <i>T</i> = 313 K) | <i>E</i><br><i>H</i><br><i>H-qh</i><br><i>TS</i><br><i>G</i><br><i>TS-qh</i><br><i>G-qh</i><br><i>TS-tr</i><br><i>G-tr</i><br><i>TS-qh-tr</i>                   | -4157.041439<br>-4156.312402<br>-4156.324370<br>0.182143<br>-4156.494545<br>0.165827<br>-4156.490197 | -4157.055016<br>-4156.326427<br>-4156.338518<br>0.182792<br>-4156.509219<br>0.166063<br>-4156.504581<br>0.177248<br>-4156.503675<br>0.160518                 |  |  |  |

|                                                                                                                                  |                 |              |              |  |  |  |
|----------------------------------------------------------------------------------------------------------------------------------|-----------------|--------------|--------------|--|--|--|
|                                                                                                                                  | <i>G-qh-tr</i>  |              | -4156.499036 |  |  |  |
| [EBIZrMe <sub>2</sub> AlMe <sub>2</sub> ][B(C <sub>6</sub> F <sub>5</sub> ) <sub>4</sub> ] isomer 2 forward ( <i>T</i> = 313 K)  | <i>E</i>        | -4157.040220 | -4157.054766 |  |  |  |
|                                                                                                                                  | <i>H</i>        | -4156.310957 | -4156.326122 |  |  |  |
|                                                                                                                                  | <i>H-qh</i>     | -4156.322943 | -4156.338066 |  |  |  |
|                                                                                                                                  | <i>TS</i>       | 0.182506     | 0.183285     |  |  |  |
|                                                                                                                                  | <i>G</i>        | -4156.493463 | -4156.509407 |  |  |  |
|                                                                                                                                  | <i>TS-qh</i>    | 0.165953     | 0.165903     |  |  |  |
|                                                                                                                                  | <i>G-qh</i>     | -4156.488896 | -4156.503969 |  |  |  |
|                                                                                                                                  | <i>TS-tr</i>    |              | 0.177741     |  |  |  |
|                                                                                                                                  | <i>G-tr</i>     |              | -4156.503863 |  |  |  |
|                                                                                                                                  | <i>TS-qh-tr</i> |              | 0.160359     |  |  |  |
|                                                                                                                                  | <i>G-qh-tr</i>  |              | -4156.498425 |  |  |  |
| [EBIZrMe <sub>2</sub> AlMe <sub>2</sub> ][B(C <sub>6</sub> F <sub>5</sub> ) <sub>4</sub> ] isomer 3 backward ( <i>T</i> = 313 K) | <i>E</i>        | -4157.039634 | -4157.053911 |  |  |  |
|                                                                                                                                  | <i>H</i>        | -4156.310343 | -4156.325233 |  |  |  |
|                                                                                                                                  | <i>H-qh</i>     | -4156.322308 | -4156.337330 |  |  |  |
|                                                                                                                                  | <i>TS</i>       | 0.182854     | 0.184676     |  |  |  |
|                                                                                                                                  | <i>G</i>        | -4156.493197 | -4156.509909 |  |  |  |
|                                                                                                                                  | <i>TS-qh</i>    | 0.165638     | 0.165961     |  |  |  |
|                                                                                                                                  | <i>G-qh</i>     | -4156.487946 | -4156.503291 |  |  |  |
|                                                                                                                                  | <i>TS-tr</i>    |              | 0.179132     |  |  |  |
|                                                                                                                                  | <i>G-tr</i>     |              | -4156.504365 |  |  |  |
|                                                                                                                                  | <i>TS-qh-tr</i> |              | 0.160416     |  |  |  |
|                                                                                                                                  | <i>G-qh-tr</i>  |              | -4156.497746 |  |  |  |
| [EBIZrMe <sub>2</sub> AlMe <sub>2</sub> ][B(C <sub>6</sub> F <sub>5</sub> ) <sub>4</sub> ] isomer 4 backward ( <i>T</i> = 313 K) | <i>E</i>        | -4157.041067 | -4157.055147 |  |  |  |
|                                                                                                                                  | <i>H</i>        | -4156.311875 | -4156.326408 |  |  |  |
|                                                                                                                                  | <i>H-qh</i>     | -4156.323511 | -4156.338152 |  |  |  |
|                                                                                                                                  | <i>TS</i>       | 0.180225     | 0.180987     |  |  |  |
|                                                                                                                                  | <i>G</i>        | -4156.492100 | -4156.507395 |  |  |  |
|                                                                                                                                  | <i>TS-qh</i>    | 0.164958     | 0.165079     |  |  |  |
|                                                                                                                                  | <i>G-qh</i>     | -4156.488469 | -4156.503231 |  |  |  |
|                                                                                                                                  | <i>TS-tr</i>    |              | 0.175443     |  |  |  |
|                                                                                                                                  | <i>G-tr</i>     |              | -4156.501851 |  |  |  |
|                                                                                                                                  | <i>TS-qh-tr</i> |              | 0.159534     |  |  |  |
|                                                                                                                                  | <i>G-qh-tr</i>  |              | -4156.497686 |  |  |  |
| [EBIZrMe <sub>2</sub> AlMe <sub>2</sub> ][B(C <sub>6</sub> F <sub>5</sub> ) <sub>4</sub> ] isomer 5 backward ( <i>T</i> = 313 K) | <i>E</i>        | -4157.039884 | -4157.054564 |  |  |  |
|                                                                                                                                  | <i>H</i>        | -4156.310643 | -4156.325625 |  |  |  |
|                                                                                                                                  | <i>H-qh</i>     | -4156.322128 | -4156.337154 |  |  |  |
|                                                                                                                                  | <i>TS</i>       | 0.179608     | 0.179835     |  |  |  |

|                                                                                                                                  |                 |              |              |  |  |  |
|----------------------------------------------------------------------------------------------------------------------------------|-----------------|--------------|--------------|--|--|--|
|                                                                                                                                  | <i>G</i>        | -4156.490251 | -4156.505460 |  |  |  |
|                                                                                                                                  | <i>TS-qh</i>    | 0.165122     | 0.165161     |  |  |  |
|                                                                                                                                  | <i>G-qh</i>     | -4156.487250 | -4156.502315 |  |  |  |
|                                                                                                                                  | <i>TS-tr</i>    |              | 0.174291     |  |  |  |
|                                                                                                                                  | <i>G-tr</i>     |              | -4156.499916 |  |  |  |
|                                                                                                                                  | <i>TS-qh-tr</i> |              | 0.159617     |  |  |  |
|                                                                                                                                  | <i>G-qh-tr</i>  |              | -4156.496771 |  |  |  |
| [EBIZrMe <sub>2</sub> AlMe <sub>2</sub> ][B(C <sub>6</sub> F <sub>5</sub> ) <sub>4</sub> ] isomer 6 forward ( <i>T</i> = 313 K)  | <i>E</i>        | -4157.040115 | -4157.054379 |  |  |  |
|                                                                                                                                  | <i>H</i>        | -4156.310906 | -4156.325447 |  |  |  |
|                                                                                                                                  | <i>H-qh</i>     | -4156.322580 | -4156.337043 |  |  |  |
|                                                                                                                                  | <i>TS</i>       | 0.180679     | 0.180810     |  |  |  |
|                                                                                                                                  | <i>G</i>        | -4156.491585 | -4156.506257 |  |  |  |
|                                                                                                                                  | <i>TS-qh</i>    | 0.165397     | 0.165037     |  |  |  |
|                                                                                                                                  | <i>G-qh</i>     | -4156.487977 | -4156.502080 |  |  |  |
|                                                                                                                                  | <i>TS-tr</i>    |              | 0.175265     |  |  |  |
|                                                                                                                                  | <i>G-tr</i>     |              | -4156.500712 |  |  |  |
|                                                                                                                                  | <i>TS-qh-tr</i> |              | 0.159493     |  |  |  |
|                                                                                                                                  | <i>G-qh-tr</i>  |              | -4156.496536 |  |  |  |
| [EBIZrMe <sub>2</sub> AlMe <sub>2</sub> ][B(C <sub>6</sub> F <sub>5</sub> ) <sub>4</sub> ] isomer 7 forward ( <i>T</i> = 313 K)  | <i>E</i>        | -4157.040288 | -4157.054759 |  |  |  |
|                                                                                                                                  | <i>H</i>        | -4156.311095 | -4156.325905 |  |  |  |
|                                                                                                                                  | <i>H-qh</i>     | -4156.322678 | -4156.337410 |  |  |  |
|                                                                                                                                  | <i>TS</i>       | 0.180261     | 0.179708     |  |  |  |
|                                                                                                                                  | <i>G</i>        | -4156.491356 | -4156.505613 |  |  |  |
|                                                                                                                                  | <i>TS-qh</i>    | 0.164949     | 0.164636     |  |  |  |
|                                                                                                                                  | <i>G-qh</i>     | -4156.487627 | -4156.502046 |  |  |  |
|                                                                                                                                  | <i>TS-tr</i>    |              | 0.174164     |  |  |  |
|                                                                                                                                  | <i>G-tr</i>     |              | -4156.500069 |  |  |  |
|                                                                                                                                  | <i>TS-qh-tr</i> |              | 0.159092     |  |  |  |
|                                                                                                                                  | <i>G-qh-tr</i>  |              | -4156.496502 |  |  |  |
| [EBIZrMe <sub>2</sub> AlMe <sub>2</sub> ][B(C <sub>6</sub> F <sub>5</sub> ) <sub>4</sub> ] isomer 8 backward ( <i>T</i> = 313 K) | <i>E</i>        | -4157.038714 | -4157.052521 |  |  |  |
|                                                                                                                                  | <i>H</i>        | -4156.309538 | -4156.323802 |  |  |  |
|                                                                                                                                  | <i>H-qh</i>     | -4156.321371 | -4156.335734 |  |  |  |
|                                                                                                                                  | <i>TS</i>       | 0.181213     | 0.181879     |  |  |  |
|                                                                                                                                  | <i>G</i>        | -4156.490751 | -4156.505681 |  |  |  |
|                                                                                                                                  | <i>TS-qh</i>    | 0.165540     | 0.165690     |  |  |  |
|                                                                                                                                  | <i>G-qh</i>     | -4156.486911 | -4156.501424 |  |  |  |
|                                                                                                                                  | <i>TS-tr</i>    |              | 0.176334     |  |  |  |
|                                                                                                                                  | <i>G-tr</i>     |              | -4156.500136 |  |  |  |

|                                                                                                                                   |                 |              |              |  |  |  |
|-----------------------------------------------------------------------------------------------------------------------------------|-----------------|--------------|--------------|--|--|--|
|                                                                                                                                   | <i>TS-qh-tr</i> |              | 0.160145     |  |  |  |
|                                                                                                                                   | <i>G-qh-tr</i>  |              | -4156.495879 |  |  |  |
| [EBIZrMe <sub>2</sub> AlMe <sub>2</sub> ][B(C <sub>6</sub> F <sub>5</sub> ) <sub>4</sub> ] isomer 9 forward ( <i>T</i> = 313 K)   | <i>E</i>        | -4157.038277 | -4157.052669 |  |  |  |
|                                                                                                                                   | <i>H</i>        | -4156.308931 | -4156.323858 |  |  |  |
|                                                                                                                                   | <i>H-qh</i>     | -4156.320706 | -4156.335729 |  |  |  |
|                                                                                                                                   | <i>TS</i>       | 0.180875     | 0.181775     |  |  |  |
|                                                                                                                                   | <i>G</i>        | -4156.489806 | -4156.505633 |  |  |  |
|                                                                                                                                   | <i>TS-qh</i>    | 0.165294     | 0.165494     |  |  |  |
|                                                                                                                                   | <i>G-qh</i>     | -4156.486000 | -4156.501223 |  |  |  |
|                                                                                                                                   | <i>TS-tr</i>    |              | 0.176230     |  |  |  |
|                                                                                                                                   | <i>G-tr</i>     |              | -4156.500088 |  |  |  |
|                                                                                                                                   | <i>TS-qh-tr</i> |              | 0.159950     |  |  |  |
|                                                                                                                                   | <i>G-qh-tr</i>  |              | -4156.495679 |  |  |  |
| [EBIZrMe <sub>2</sub> AlMe <sub>2</sub> ][B(C <sub>6</sub> F <sub>5</sub> ) <sub>4</sub> ] isomer 10 backward ( <i>T</i> = 313 K) | <i>E</i>        | -4157.034508 | -4157.052335 |  |  |  |
|                                                                                                                                   | <i>H</i>        | -4156.305310 | -4156.323637 |  |  |  |
|                                                                                                                                   | <i>H-qh</i>     | -4156.316968 | -4156.335292 |  |  |  |
|                                                                                                                                   | <i>TS</i>       | 0.181727     | 0.181931     |  |  |  |
|                                                                                                                                   | <i>G</i>        | -4156.487037 | -4156.505568 |  |  |  |
|                                                                                                                                   | <i>TS-qh</i>    | 0.165638     | 0.165688     |  |  |  |
|                                                                                                                                   | <i>G-qh</i>     | -4156.482606 | -4156.500980 |  |  |  |
|                                                                                                                                   | <i>TS-tr</i>    |              | 0.176386     |  |  |  |
|                                                                                                                                   | <i>G-tr</i>     |              | -4156.500023 |  |  |  |
|                                                                                                                                   | <i>TS-qh-tr</i> |              | 0.160144     |  |  |  |
|                                                                                                                                   | <i>G-qh-tr</i>  |              | -4156.495436 |  |  |  |
| [Cp <sub>2</sub> ZrMe] <sup>+</sup> ( <i>T</i> = 313 K)                                                                           | <i>E</i>        | -473.715541  | -473.770616  |  |  |  |
|                                                                                                                                   | <i>H</i>        | -473.496275  | -473.550513  |  |  |  |
|                                                                                                                                   | <i>H-qh</i>     | -473.497865  | -473.551471  |  |  |  |
|                                                                                                                                   | <i>TS</i>       | 0.056804     | 0.052789     |  |  |  |
|                                                                                                                                   | <i>G</i>        | -473.553079  | -473.603302  |  |  |  |
|                                                                                                                                   | <i>TS-qh</i>    | 0.053617     | 0.052111     |  |  |  |
|                                                                                                                                   | <i>G-qh</i>     | -473.551482  | -473.603582  |  |  |  |
|                                                                                                                                   | <i>TS-tr</i>    |              | 0.047244     |  |  |  |
|                                                                                                                                   | <i>G-tr</i>     |              | -473.597757  |  |  |  |
|                                                                                                                                   | <i>TS-qh-tr</i> |              | 0.046566     |  |  |  |
|                                                                                                                                   | <i>G-qh-tr</i>  |              | -473.598037  |  |  |  |
| [Cp <sub>2</sub> ZrMe] <sup>+</sup> -benzene ( <i>T</i> = 313 K)                                                                  | <i>E</i>        | -705.979519  | -706.017164  |  |  |  |
|                                                                                                                                   | <i>H</i>        | -705.650344  | -705.687918  |  |  |  |
|                                                                                                                                   | <i>H-qh</i>     | -705.652971  | -705.690455  |  |  |  |

|                                                                                                  |                 |              |              |  |  |  |
|--------------------------------------------------------------------------------------------------|-----------------|--------------|--------------|--|--|--|
|                                                                                                  | <i>TS</i>       | 0.068479     | 0.067879     |  |  |  |
|                                                                                                  | <i>G</i>        | -705.718823  | -705.755797  |  |  |  |
|                                                                                                  | <i>TS-qh</i>    | 0.066170     | 0.065951     |  |  |  |
|                                                                                                  | <i>G-qh</i>     | -705.719141  | -705.756406  |  |  |  |
|                                                                                                  | <i>TS-tr</i>    |              | 0.062334     |  |  |  |
|                                                                                                  | <i>G-tr</i>     |              | -705.750252  |  |  |  |
|                                                                                                  | <i>TS-qh-tr</i> |              | 0.060406     |  |  |  |
|                                                                                                  | <i>G-qh-tr</i>  |              | -705.750861  |  |  |  |
| [Cp <sub>2</sub> ZrMe <sub>2</sub> AlMe <sub>2</sub> ] <sup>+</sup> ( <i>T</i> = 313 K)          | <i>E</i>        | -835.919851  | -835.958817  |  |  |  |
|                                                                                                  | <i>H</i>        | -835.580717  | -835.619858  |  |  |  |
|                                                                                                  | <i>H-qh</i>     | -835.583455  | -835.622588  |  |  |  |
|                                                                                                  | <i>TS</i>       | 0.073964     | 0.073612     |  |  |  |
|                                                                                                  | <i>G</i>        | -835.654681  | -835.693470  |  |  |  |
|                                                                                                  | <i>TS-qh</i>    | 0.071124     | 0.071023     |  |  |  |
|                                                                                                  | <i>G-qh</i>     | -835.654579  | -835.693611  |  |  |  |
|                                                                                                  | <i>TS-tr</i>    |              | 0.068067     |  |  |  |
|                                                                                                  | <i>G-tr</i>     |              | -835.687925  |  |  |  |
|                                                                                                  | <i>TS-qh-tr</i> |              | 0.065479     |  |  |  |
|                                                                                                  | <i>G-qh-tr</i>  |              | -835.688067  |  |  |  |
| [Cp <sub>2</sub> ZrMe <sub>2</sub> AlMe <sub>2</sub> ] <sup>+</sup> -benzene ( <i>T</i> = 313 K) | <i>E</i>        | -1068.148699 | -1068.184937 |  |  |  |
|                                                                                                  | <i>H</i>        | -1067.700635 | -1067.736945 |  |  |  |
|                                                                                                  | <i>H-qh</i>     | -1067.705807 | -1067.742126 |  |  |  |
|                                                                                                  | <i>TS</i>       | 0.091133     | 0.091594     |  |  |  |
|                                                                                                  | <i>G</i>        | -1067.791768 | -1067.828539 |  |  |  |
|                                                                                                  | <i>TS-qh</i>    | 0.085100     | 0.085022     |  |  |  |
|                                                                                                  | <i>G-qh</i>     | -1067.790907 | -1067.827148 |  |  |  |
|                                                                                                  | <i>TS-tr</i>    |              | 0.086050     |  |  |  |
|                                                                                                  | <i>G-tr</i>     |              | -1067.822995 |  |  |  |
|                                                                                                  | <i>TS-qh-tr</i> |              | 0.079477     |  |  |  |
|                                                                                                  | <i>G-qh-tr</i>  |              | -1067.821603 |  |  |  |
| [Me <sub>2</sub> CCp <sub>2</sub> ZrMe] <sup>+</sup> ( <i>T</i> = 313 K)                         | <i>E</i>        | -590.435937  | -590.494865  |  |  |  |
|                                                                                                  | <i>H</i>        | -590.149908  | -590.208110  |  |  |  |
|                                                                                                  | <i>H-qh</i>     | -590.151222  | -590.208706  |  |  |  |
|                                                                                                  | <i>TS</i>       | 0.060331     | 0.057538     |  |  |  |
|                                                                                                  | <i>G</i>        | -590.210239  | -590.265648  |  |  |  |
|                                                                                                  | <i>TS-qh</i>    | 0.058832     | 0.057397     |  |  |  |
|                                                                                                  | <i>G-qh</i>     | -590.210054  | -590.266103  |  |  |  |
|                                                                                                  | <i>TS-tr</i>    |              | 0.051994     |  |  |  |

|                                                                                                                  |                                                                                                                                                                        |                                                                                                                                                                  |                                                                                                                                                                  |  |  |  |
|------------------------------------------------------------------------------------------------------------------|------------------------------------------------------------------------------------------------------------------------------------------------------------------------|------------------------------------------------------------------------------------------------------------------------------------------------------------------|------------------------------------------------------------------------------------------------------------------------------------------------------------------|--|--|--|
|                                                                                                                  | <i>G</i> -tr<br><i>TS</i> -qh-tr<br><i>G</i> -qh-tr                                                                                                                    |                                                                                                                                                                  | -590.260104<br>0.051852<br>-590.260558                                                                                                                           |  |  |  |
| [Me <sub>2</sub> Cp <sub>2</sub> ZrMe] <sup>+</sup> -benzene ( <i>T</i> = 313 K)                                 | <i>E</i><br><i>H</i><br><i>H</i> -qh<br><i>TS</i><br><i>G</i><br><i>TS</i> -qh<br><i>G</i> -qh<br><i>TS</i> -tr<br><i>G</i> -tr<br><i>TS</i> -qh-tr<br><i>G</i> -qh-tr | -822.703334<br>-822.307637<br>-822.310182<br>0.074029<br>-822.381666<br>0.071502<br>-822.381684<br><br>0.067958<br>-822.411572<br>0.065768<br>-822.411844        | -822.739344<br>-822.343614<br>-822.346076<br>0.073502<br>-822.417116<br>0.071313<br>-822.417389<br><br>0.067958<br>-822.411572<br>0.065768<br>-822.411844        |  |  |  |
| [Me <sub>2</sub> Cp <sub>2</sub> ZrMe <sub>2</sub> AlMe <sub>2</sub> ] <sup>+</sup> ( <i>T</i> = 313 K)          | <i>E</i><br><i>H</i><br><i>H</i> -qh<br><i>TS</i><br><i>G</i><br><i>TS</i> -qh<br><i>G</i> -qh<br><i>TS</i> -tr<br><i>G</i> -tr<br><i>TS</i> -qh-tr<br><i>G</i> -qh-tr | -952.640554<br>-952.235210<br>-952.237878<br>0.079270<br>-952.314480<br>0.077039<br>-952.314917<br><br>0.073423<br>-952.345406<br>0.071285<br>-952.345937        | -952.677359<br>-952.271983<br>-952.274652<br>0.078968<br>-952.350951<br>0.076830<br>-952.351482<br><br>0.073423<br>-952.345406<br>0.071285<br>-952.345937        |  |  |  |
| [Me <sub>2</sub> Cp <sub>2</sub> ZrMe <sub>2</sub> AlMe <sub>2</sub> ] <sup>+</sup> -benzene ( <i>T</i> = 313 K) | <i>E</i><br><i>H</i><br><i>H</i> -qh<br><i>TS</i><br><i>G</i><br><i>TS</i> -qh<br><i>G</i> -qh<br><i>TS</i> -tr<br><i>G</i> -tr<br><i>TS</i> -qh-tr<br><i>G</i> -qh-tr | -1184.868558<br>-1184.354286<br>-1184.359428<br>0.097867<br>-1184.452153<br>0.090688<br>-1184.450116<br><br>0.091163<br>-1184.479811<br>0.084946<br>-1184.478609 | -1184.902805<br>-1184.388648<br>-1184.393663<br>0.096708<br>-1184.485356<br>0.090490<br>-1184.484153<br><br>0.091163<br>-1184.479811<br>0.084946<br>-1184.478609 |  |  |  |
| [EBI <sub>2</sub> ZrMe] <sup>+</sup> forward ( <i>T</i> = 313 K)                                                 | <i>E</i><br><i>H</i>                                                                                                                                                   | -858.404160<br>-858.045943                                                                                                                                       | -858.440750<br>-858.082601                                                                                                                                       |  |  |  |

|                                                                                                            |                                                                                                                                                                        |                                                                                                      |                                                                                                                                                              |  |  |  |
|------------------------------------------------------------------------------------------------------------|------------------------------------------------------------------------------------------------------------------------------------------------------------------------|------------------------------------------------------------------------------------------------------|--------------------------------------------------------------------------------------------------------------------------------------------------------------|--|--|--|
|                                                                                                            | <i>H</i> -qh<br><i>TS</i><br><i>G</i><br><i>TS</i> -qh<br><i>G</i> -qh<br><i>TS</i> -tr<br><i>G</i> -tr<br><i>TS</i> -qh-tr<br><i>G</i> -qh-tr                         | -858.047364<br>0.066505<br>-858.112448<br>0.066015<br>-858.113379                                    | -858.083980<br>0.066339<br>-858.148940<br>0.065883<br>-858.149863<br>0.060794<br>-858.143395<br>0.060338<br>-858.144318                                      |  |  |  |
| [EBI <sub>2</sub> ZrMe] <sup>+</sup> -benzene forward ( <i>T</i> = 313 K)                                  | <i>E</i><br><i>H</i><br><i>H</i> -qh<br><i>TS</i><br><i>G</i><br><i>TS</i> -qh<br><i>G</i> -qh<br><i>TS</i> -tr<br><i>G</i> -tr<br><i>TS</i> -qh-tr<br><i>G</i> -qh-tr | -1090.654052<br>-1090.186853<br>-1090.189902<br>0.081433<br>-1090.268286<br>0.079351<br>-1090.269253 | -1090.687605<br>-1090.220491<br>-1090.223545<br>0.081458<br>-1090.301949<br>0.079253<br>-1090.302798<br>0.075914<br>-1090.296405<br>0.073709<br>-1090.297254 |  |  |  |
| [EBI <sub>2</sub> ZrMe <sub>2</sub> AlMe <sub>2</sub> ] <sup>+</sup> backward ( <i>T</i> = 313 K)          | <i>E</i><br><i>H</i><br><i>H</i> -qh<br><i>TS</i><br><i>G</i><br><i>TS</i> -qh<br><i>G</i> -qh<br><i>TS</i> -tr<br><i>G</i> -tr<br><i>TS</i> -qh-tr<br><i>G</i> -qh-tr | -1220.597511<br>-1220.120265<br>-1220.123501<br>0.087133<br>-1220.207398<br>0.084370<br>-1220.207871 | -1220.631515<br>-1220.154401<br>-1220.157565<br>0.086790<br>-1220.241191<br>0.084191<br>-1220.241756<br>0.081245<br>-1220.235646<br>0.078646<br>-1220.236211 |  |  |  |
| [EBI <sub>2</sub> ZrMe <sub>2</sub> AlMe <sub>2</sub> ] <sup>+</sup> -benzene backward ( <i>T</i> = 313 K) | <i>E</i><br><i>H</i><br><i>H</i> -qh<br><i>TS</i><br><i>G</i><br><i>TS</i> -qh<br><i>G</i> -qh                                                                         | -1452.825344<br>-1452.239157<br>-1452.244860<br>0.104437<br>-1452.343594<br>0.097853<br>-1452.342713 | -1452.858222<br>-1452.272208<br>-1452.277846<br>0.104373<br>-1452.376581<br>0.097700<br>-1452.375546                                                         |  |  |  |

|                                                                                                           |                 |              |              |  |  |  |
|-----------------------------------------------------------------------------------------------------------|-----------------|--------------|--------------|--|--|--|
|                                                                                                           | <i>TS-tr</i>    |              | 0.098828     |  |  |  |
|                                                                                                           | <i>G-tr</i>     |              | -1452.371036 |  |  |  |
|                                                                                                           | <i>TS-qh-tr</i> |              | 0.092156     |  |  |  |
|                                                                                                           | <i>G-qh-tr</i>  |              | -1452.370002 |  |  |  |
| $[\text{B}(\text{C}_6\text{F}_5)_4]^- (T = 313 \text{ K})$                                                | <i>E</i>        | -2936.349282 | -2936.377345 |  |  |  |
|                                                                                                           | <i>H</i>        | -2936.099727 | -2936.128051 |  |  |  |
|                                                                                                           | <i>H-qh</i>     | -2936.105989 | -2936.134313 |  |  |  |
|                                                                                                           | <i>TS</i>       | 0.117035     | 0.117768     |  |  |  |
|                                                                                                           | <i>G</i>        | -2936.216762 | -2936.245819 |  |  |  |
|                                                                                                           | <i>TS-qh</i>    | 0.108615     | 0.109316     |  |  |  |
|                                                                                                           | <i>G-qh</i>     | -2936.214604 | -2936.243629 |  |  |  |
|                                                                                                           | <i>TS-tr</i>    |              | 0.112223     |  |  |  |
|                                                                                                           | <i>G-tr</i>     |              | -2936.240274 |  |  |  |
|                                                                                                           | <i>TS-qh-tr</i> |              | 0.103772     |  |  |  |
|                                                                                                           | <i>G-qh-tr</i>  |              | -2936.238085 |  |  |  |
| $[\text{B}(\text{C}_6\text{F}_5)_4]^- \text{-benzene} (T = 313 \text{ K})$                                | <i>E</i>        | -3168.577451 | -3168.606095 |  |  |  |
|                                                                                                           | <i>H</i>        | -3168.218738 | -3168.247662 |  |  |  |
|                                                                                                           | <i>H-qh</i>     | -3168.227142 | -3168.256078 |  |  |  |
|                                                                                                           | <i>TS</i>       | 0.132912     | 0.133059     |  |  |  |
|                                                                                                           | <i>G</i>        | -3168.351650 | -3168.380721 |  |  |  |
|                                                                                                           | <i>TS-qh</i>    | 0.122335     | 0.122403     |  |  |  |
|                                                                                                           | <i>G-qh</i>     | -3168.349477 | -3168.378481 |  |  |  |
|                                                                                                           | <i>TS-tr</i>    |              | 0.127514     |  |  |  |
|                                                                                                           | <i>G-tr</i>     |              | -3168.375176 |  |  |  |
|                                                                                                           | <i>TS-qh-tr</i> |              | 0.116859     |  |  |  |
|                                                                                                           | <i>G-qh-tr</i>  |              | -3168.372937 |  |  |  |
| $[\text{Cp}_2\text{ZrMe}][\text{B}(\text{C}_6\text{F}_5)_4] \text{-benzene isomer 1} (T = 313 \text{ K})$ | <i>E</i>        | -3642.429500 | -3642.442991 |  |  |  |
|                                                                                                           | <i>H</i>        | -3641.848103 | -3641.861889 |  |  |  |
|                                                                                                           | <i>H-qh</i>     | -3641.858782 | -3641.872577 |  |  |  |
|                                                                                                           | <i>TS</i>       | 0.161051     | 0.161339     |  |  |  |
|                                                                                                           | <i>G</i>        | -3642.009154 | -3642.023228 |  |  |  |
|                                                                                                           | <i>TS-qh</i>    | 0.148149     | 0.148237     |  |  |  |
|                                                                                                           | <i>G-qh</i>     | -3642.006931 | -3642.020814 |  |  |  |
|                                                                                                           | <i>TS-tr</i>    |              | 0.155795     |  |  |  |
|                                                                                                           | <i>G-tr</i>     |              | -3642.017684 |  |  |  |
|                                                                                                           | <i>TS-qh-tr</i> |              | 0.142692     |  |  |  |
|                                                                                                           | <i>G-qh-tr</i>  |              | -3642.015269 |  |  |  |
| $[\text{Cp}_2\text{ZrMe}][\text{B}(\text{C}_6\text{F}_5)_4] \text{-benzene isomer 2} (T = 313 \text{ K})$ | <i>E</i>        | -3642.426173 | -3642.441052 |  |  |  |

|                                                                                                                                      |                 |              |              |  |  |  |
|--------------------------------------------------------------------------------------------------------------------------------------|-----------------|--------------|--------------|--|--|--|
|                                                                                                                                      | <i>H</i>        | -3641.844888 | -3641.860058 |  |  |  |
|                                                                                                                                      | <i>H-qh</i>     | -3641.855882 | -3641.871117 |  |  |  |
|                                                                                                                                      | <i>TS</i>       | 0.162589     | 0.163376     |  |  |  |
|                                                                                                                                      | <i>G</i>        | -3642.007477 | -3642.023434 |  |  |  |
|                                                                                                                                      | <i>TS-qh</i>    | 0.148323     | 0.148492     |  |  |  |
|                                                                                                                                      | <i>G-qh</i>     | -3642.004205 | -3642.019609 |  |  |  |
|                                                                                                                                      | <i>TS-tr</i>    |              | 0.157831     |  |  |  |
|                                                                                                                                      | <i>G-tr</i>     |              | -3642.017889 |  |  |  |
|                                                                                                                                      | <i>TS-qh-tr</i> |              | 0.142948     |  |  |  |
|                                                                                                                                      | <i>G-qh-tr</i>  |              | -3642.014065 |  |  |  |
| [Cp <sub>2</sub> ZrMe <sub>2</sub> AlMe <sub>2</sub> ][B(C <sub>6</sub> F <sub>5</sub> ) <sub>4</sub> ]-benzene ( <i>T</i> = 313 K)  | <i>E</i>        | -4004.596103 | -4004.609742 |  |  |  |
|                                                                                                                                      | <i>H</i>        | -4003.895952 | -4003.910013 |  |  |  |
|                                                                                                                                      | <i>H-qh</i>     | -4003.909729 | -4003.923681 |  |  |  |
|                                                                                                                                      | <i>TS</i>       | 0.187166     | 0.186284     |  |  |  |
|                                                                                                                                      | <i>G</i>        | -4004.083118 | -4004.096297 |  |  |  |
|                                                                                                                                      | <i>TS-qh</i>    | 0.166581     | 0.166654     |  |  |  |
|                                                                                                                                      | <i>G-qh</i>     | -4004.076310 | -4004.090335 |  |  |  |
|                                                                                                                                      | <i>TS-tr</i>    |              | 0.180739     |  |  |  |
|                                                                                                                                      | <i>G-tr</i>     |              | -4004.090752 |  |  |  |
|                                                                                                                                      | <i>TS-qh-tr</i> |              | 0.161109     |  |  |  |
|                                                                                                                                      | <i>G-qh-tr</i>  |              | -4004.084790 |  |  |  |
| [Cp <sub>2</sub> ZrMe][B(C <sub>6</sub> F <sub>5</sub> ) <sub>4</sub> ]-2benzene ( <i>T</i> = 313 K)                                 | <i>E</i>        | -3874.659502 | -3874.673576 |  |  |  |
|                                                                                                                                      | <i>H</i>        | -3873.969000 | -3873.983568 |  |  |  |
|                                                                                                                                      | <i>H-qh</i>     | -3873.981610 | -3873.996371 |  |  |  |
|                                                                                                                                      | <i>TS</i>       | 0.175164     | 0.176333     |  |  |  |
|                                                                                                                                      | <i>G</i>        | -3874.144164 | -3874.159901 |  |  |  |
|                                                                                                                                      | <i>TS-qh</i>    | 0.161103     | 0.161372     |  |  |  |
|                                                                                                                                      | <i>G-qh</i>     | -3874.142713 | -3874.157743 |  |  |  |
|                                                                                                                                      | <i>TS-tr</i>    |              | 0.170788     |  |  |  |
|                                                                                                                                      | <i>G-tr</i>     |              | -3874.154356 |  |  |  |
|                                                                                                                                      | <i>TS-qh-tr</i> |              | 0.155828     |  |  |  |
|                                                                                                                                      | <i>G-qh-tr</i>  |              | -3874.152199 |  |  |  |
| [Cp <sub>2</sub> ZrMe <sub>2</sub> AlMe <sub>2</sub> ][B(C <sub>6</sub> F <sub>5</sub> ) <sub>4</sub> ]-2benzene ( <i>T</i> = 313 K) | <i>E</i>        | -4236.826586 | -4236.840473 |  |  |  |
|                                                                                                                                      | <i>H</i>        | -4236.017373 | -4236.031777 |  |  |  |
|                                                                                                                                      | <i>H-qh</i>     | -4236.033285 | -4236.047723 |  |  |  |
|                                                                                                                                      | <i>TS</i>       | 0.201866     | 0.201999     |  |  |  |
|                                                                                                                                      | <i>G</i>        | -4236.219239 | -4236.233776 |  |  |  |
|                                                                                                                                      | <i>TS-qh</i>    | 0.179679     | 0.179790     |  |  |  |

|                                                                                                                                                     |                                                                                                                                                                        |                                                                                                      |                                                                                                                                                              |  |  |  |
|-----------------------------------------------------------------------------------------------------------------------------------------------------|------------------------------------------------------------------------------------------------------------------------------------------------------------------------|------------------------------------------------------------------------------------------------------|--------------------------------------------------------------------------------------------------------------------------------------------------------------|--|--|--|
|                                                                                                                                                     | G-qh<br>TS-tr<br>G-tr<br>TS-qh-tr<br>G-qh-tr                                                                                                                           | -4236.212964                                                                                         | -4236.227513<br>0.196455<br>-4236.228232<br>0.174246<br>-4236.221969                                                                                         |  |  |  |
| [Me <sub>2</sub> Cp <sub>2</sub> ZrMe][B(C <sub>6</sub> F <sub>5</sub> ) <sub>4</sub> ]-benzene ( <i>T</i> = 313 K)                                 | <i>E</i><br><i>H</i><br><i>H</i> -qh<br><i>TS</i><br><i>G</i><br><i>TS</i> -qh<br><i>G</i> -qh<br><i>TS</i> -tr<br><i>G</i> -tr<br><i>TS</i> -qh-tr<br><i>G</i> -qh-tr | -3759.146304<br>-3758.498439<br>-3758.509490<br>0.169170<br>-3758.667609<br>0.153270<br>-3758.662760 | -3759.160744<br>-3758.513284<br>-3758.524399<br>0.169715<br>-3758.682999<br>0.153452<br>-3758.677851<br>0.164170<br>-3758.677454<br>0.147907<br>-3758.672306 |  |  |  |
| [Me <sub>2</sub> Cp <sub>2</sub> ZrMe <sub>2</sub> AlMe <sub>2</sub> ][B(C <sub>6</sub> F <sub>5</sub> ) <sub>4</sub> ]-benzene ( <i>T</i> = 313 K) | <i>E</i><br><i>H</i><br><i>H</i> -qh<br><i>TS</i><br><i>G</i><br><i>TS</i> -qh<br><i>G</i> -qh<br><i>TS</i> -tr<br><i>G</i> -tr<br><i>TS</i> -qh-tr<br><i>G</i> -qh-tr | -4121.313415<br>-4120.546648<br>-4120.560292<br>0.190978<br>-4120.737626<br>0.171191<br>-4120.731483 | -4121.327752<br>-4120.561522<br>-4120.575164<br>0.191395<br>-4120.752917<br>0.171365<br>-4120.746529<br>0.185851<br>-4120.747373<br>0.165820<br>-4120.740984 |  |  |  |
| [EBI <sub>2</sub> ZrMe][B(C <sub>6</sub> F <sub>5</sub> ) <sub>4</sub> ]-benzene forward ( <i>T</i> = 313 K)                                        | <i>E</i><br><i>H</i><br><i>H</i> -qh<br><i>TS</i><br><i>G</i><br><i>TS</i> -qh<br><i>G</i> -qh<br><i>TS</i> -tr<br><i>G</i> -tr<br><i>TS</i> -qh-tr<br><i>G</i> -qh-tr | -4027.096558<br>-4026.377403<br>-4026.388936<br>0.175813<br>-4026.553216<br>0.160423<br>-4026.549359 | -4027.110110<br>-4026.391255<br>-4026.402928<br>0.176671<br>-4026.567926<br>0.160603<br>-4026.563531<br>0.171127<br>-4026.562382<br>0.155059<br>-4026.557987 |  |  |  |

|                                                                                                                                       |                                                                                                                                                                        |                                                                                                                                                                  |                                                                                                                                                                  |  |  |                                                                                                                                                              |
|---------------------------------------------------------------------------------------------------------------------------------------|------------------------------------------------------------------------------------------------------------------------------------------------------------------------|------------------------------------------------------------------------------------------------------------------------------------------------------------------|------------------------------------------------------------------------------------------------------------------------------------------------------------------|--|--|--------------------------------------------------------------------------------------------------------------------------------------------------------------|
| [EBI <sub>2</sub> ZrMe <sub>2</sub> AlMe <sub>2</sub> ][B(C <sub>6</sub> F <sub>5</sub> ) <sub>4</sub> ]-benzene backward (T = 313 K) | <i>E</i><br><i>H</i><br><i>H</i> -qh<br><i>TS</i><br><i>G</i><br><i>TS</i> -qh<br><i>G</i> -qh<br><i>TS</i> -tr<br><i>G</i> -tr<br><i>TS</i> -qh-tr<br><i>G</i> -qh-tr | -4389.267285<br>-4388.429260<br>-4388.443622<br>0.198836<br>-4388.628096<br>0.178791<br>-4388.622413<br><br>0.193424<br>-4388.637294<br>0.173377<br>-4388.631666 | -4389.281388<br>-4388.443870<br>-4388.458289<br>0.198968<br>-4388.642838<br>0.178922<br>-4388.637211<br><br>0.193424<br>-4388.637294<br>0.173377<br>-4388.631666 |  |  |                                                                                                                                                              |
| PBB                                                                                                                                   | <i>E</i><br><i>H</i><br><i>H</i> -qh<br><i>TS</i><br><i>G</i><br><i>TS</i> -qh<br><i>G</i> -qh<br><i>TS</i> -tr<br><i>G</i> -tr<br><i>TS</i> -qh-tr<br><i>G</i> -qh-tr | -4092.354634<br>-4091.996324<br>-4092.005834<br>0.143598<br>-4092.139922<br>0.129196<br>-4092.135030<br><br><br><br><br><br><br><br><br><br>                     |                                                                                                                                                                  |  |  | -4092.359772<br>-4092.001864<br>-4092.011360<br>0.143523<br>-4092.145387<br>0.129221<br>-4092.140581<br>0.138265<br>-4092.140129<br>0.123963<br>-4092.135323 |
| Cp'' <sub>2</sub> ZrMe <sub>2</sub> C <sub>s</sub>                                                                                    | <i>E</i><br><i>H</i><br><i>H</i> -qh<br><i>TS</i><br><i>G</i><br><i>TS</i> -qh<br><i>G</i> -qh<br><i>TS</i> -tr<br><i>G</i> -tr<br><i>TS</i> -qh-tr<br><i>G</i> -qh-tr | -671.101151<br>-670.727659<br>-670.730144<br>0.070094<br>-670.797753<br>0.067737<br>-670.797881<br><br><br><br><br><br><br><br><br><br>                          |                                                                                                                                                                  |  |  | -671.103863<br>-670.730673<br>-670.733106<br>0.069894<br>-670.800567<br>0.067710<br>-670.800816<br>0.064636<br>-670.795309<br>0.062452<br>-670.795558        |
| Cp'' <sub>2</sub> ZrMe <sub>2</sub> C <sub>2</sub>                                                                                    | <i>E</i><br><i>H</i><br><i>H</i> -qh<br><i>TS</i><br><i>G</i>                                                                                                          | -671.101388<br>-670.727824<br>-670.730022<br>0.068305<br>-670.796129                                                                                             |                                                                                                                                                                  |  |  | -671.104117<br>-670.730875<br>-670.733064<br>0.068220<br>-670.799095                                                                                         |

|                                                        |                                                                                                                                                                 |                                                                                                      |  |  |  |                                                                                                                                                              |
|--------------------------------------------------------|-----------------------------------------------------------------------------------------------------------------------------------------------------------------|------------------------------------------------------------------------------------------------------|--|--|--|--------------------------------------------------------------------------------------------------------------------------------------------------------------|
|                                                        | <i>TS-qh</i><br><i>G-qh</i><br><i>TS-tr</i><br><i>G-tr</i><br><i>TS-qh-tr</i><br><i>G-qh-tr</i>                                                                 | 0.066599<br>-670.796621                                                                              |  |  |  | 0.066695<br>-670.799759<br>0.062962<br>-670.793837<br>0.061437<br>-670.794501                                                                                |
| [Cp <sup>''</sup> <sub>2</sub> ZrMe][Me(PBB)] isomer 1 | <i>E</i><br><i>H</i><br><i>H-qh</i><br><i>TS</i><br><i>G</i><br><i>TS-qh</i><br><i>G-qh</i><br><i>TS-tr</i><br><i>G-tr</i><br><i>TS-qh-tr</i><br><i>G-qh-tr</i> | -4763.496121<br>-4762.759774<br>-4762.772777<br>0.182143<br>-4762.941917<br>0.166534<br>-4762.939311 |  |  |  | -4763.504570<br>-4762.768753<br>-4762.781682<br>0.181994<br>-4762.950747<br>0.166506<br>-4762.948188<br>0.176736<br>-4762.945489<br>0.161248<br>-4762.942930 |
| [Cp <sup>''</sup> <sub>2</sub> ZrMe][Me(PBB)] isomer 2 | <i>E</i><br><i>H</i><br><i>H-qh</i><br><i>TS</i><br><i>G</i><br><i>TS-qh</i><br><i>G-qh</i><br><i>TS-tr</i><br><i>G-tr</i><br><i>TS-qh-tr</i><br><i>G-qh-tr</i> | -4763.495417<br>-4762.759137<br>-4762.772111<br>0.181806<br>-4762.940943<br>0.166263<br>-4762.938374 |  |  |  | -4763.504176<br>-4762.768524<br>-4762.781676<br>0.182573<br>-4762.951097<br>0.166499<br>-4762.948175<br>0.177315<br>-4762.945839<br>0.161241<br>-4762.942917 |
| [Cp <sup>''</sup> <sub>2</sub> ZrMe][Me(PBB)] isomer 3 | <i>E</i><br><i>H</i><br><i>H-qh</i><br><i>TS</i><br><i>G</i><br><i>TS-qh</i><br><i>G-qh</i><br><i>TS-tr</i><br><i>G-tr</i><br><i>TS-qh-tr</i>                   | -4763.493749<br>-4762.757163<br>-4762.770086<br>0.182315<br>-4762.939478<br>0.166151<br>-4762.936237 |  |  |  | -4763.502577<br>-4762.766548<br>-4762.779518<br>0.182751<br>-4762.949299<br>0.166247<br>-4762.945765<br>0.177493<br>-4762.944041<br>0.160989                 |

|                                                                 |                 |              |  |  |  |              |
|-----------------------------------------------------------------|-----------------|--------------|--|--|--|--------------|
|                                                                 | <i>G-qh-tr</i>  |              |  |  |  | -4762.940507 |
| [Cp'' <sub>2</sub> ZrMe][Me(PBB)] isomer 4                      | <i>E</i>        | -4763.494360 |  |  |  | -4763.503344 |
|                                                                 | <i>H</i>        | -4762.757846 |  |  |  | -4762.767349 |
|                                                                 | <i>H-qh</i>     | -4762.770603 |  |  |  | -4762.780116 |
|                                                                 | <i>TS</i>       | 0.180634     |  |  |  | 0.181054     |
|                                                                 | <i>G</i>        | -4762.938480 |  |  |  | -4762.948403 |
|                                                                 | <i>TS-qh</i>    | 0.165593     |  |  |  | 0.165600     |
|                                                                 | <i>G-qh</i>     | -4762.936196 |  |  |  | -4762.945716 |
|                                                                 | <i>TS-tr</i>    |              |  |  |  | 0.175796     |
|                                                                 | <i>G-tr</i>     |              |  |  |  | -4762.943145 |
|                                                                 | <i>TS-qh-tr</i> |              |  |  |  | 0.160342     |
|                                                                 | <i>G-qh-tr</i>  |              |  |  |  | -4762.940458 |
| [Cp'' <sub>2</sub> ZrMe][Me(PBB)] isomer 5                      | <i>E</i>        | -4763.492955 |  |  |  | -4763.501824 |
|                                                                 | <i>H</i>        | -4762.756564 |  |  |  | -4762.765955 |
|                                                                 | <i>H-qh</i>     | -4762.769497 |  |  |  | -4762.778918 |
|                                                                 | <i>TS</i>       | 0.181434     |  |  |  | 0.181514     |
|                                                                 | <i>G</i>        | -4762.937998 |  |  |  | -4762.947469 |
|                                                                 | <i>TS-qh</i>    | 0.166281     |  |  |  | 0.166367     |
|                                                                 | <i>G-qh</i>     | -4762.935778 |  |  |  | -4762.945285 |
|                                                                 | <i>TS-tr</i>    |              |  |  |  | 0.176256     |
|                                                                 | <i>G-tr</i>     |              |  |  |  | -4762.942211 |
|                                                                 | <i>TS-qh-tr</i> |              |  |  |  | 0.161109     |
|                                                                 | <i>G-qh-tr</i>  |              |  |  |  | -4762.940027 |
| [Cp'' <sub>2</sub> ZrMe][Me(PBB)] isomer 6                      | <i>E</i>        | -4763.492476 |  |  |  | -4763.501428 |
|                                                                 | <i>H</i>        | -4762.756010 |  |  |  | -4762.765476 |
|                                                                 | <i>H-qh</i>     | -4762.768924 |  |  |  | -4762.778512 |
|                                                                 | <i>TS</i>       | 0.182136     |  |  |  | 0.182613     |
|                                                                 | <i>G</i>        | -4762.938146 |  |  |  | -4762.948089 |
|                                                                 | <i>TS-qh</i>    | 0.165868     |  |  |  | 0.166215     |
|                                                                 | <i>G-qh</i>     | -4762.934792 |  |  |  | -4762.944727 |
|                                                                 | <i>TS-tr</i>    |              |  |  |  | 0.177355     |
|                                                                 | <i>G-tr</i>     |              |  |  |  | -4762.942831 |
|                                                                 | <i>TS-qh-tr</i> |              |  |  |  | 0.160957     |
|                                                                 | <i>G-qh-tr</i>  |              |  |  |  | -4762.939469 |
| <i>syn</i> -[(Cp'' <sub>2</sub> ZrMe) <sub>2</sub> μ-Me][MePBB] | <i>E</i>        | -5434.619783 |  |  |  | -5434.631549 |
|                                                                 | <i>H</i>        | -5433.507136 |  |  |  | -5433.519538 |
|                                                                 | <i>H-qh</i>     | -5433.524930 |  |  |  | -5433.537353 |
|                                                                 | <i>TS</i>       | 0.230898     |  |  |  | 0.232268     |

|                                                                                       |                                                                                    |                                                                                                      |  |  |  |                                                                                                                                                              |
|---------------------------------------------------------------------------------------|------------------------------------------------------------------------------------|------------------------------------------------------------------------------------------------------|--|--|--|--------------------------------------------------------------------------------------------------------------------------------------------------------------|
|                                                                                       | G<br>TS-qh<br>G-qh<br>TS-tr<br>G-tr<br>TS-qh-tr<br>G-qh-tr                         | -5433.738034<br>0.207374<br>-5433.732304                                                             |  |  |  | -5433.751806<br>0.207405<br>-5433.744758<br>0.227010<br>-5433.746548<br>0.202147<br>-5433.739500                                                             |
| <i>anti</i> -[(Cp <sup>''</sup> <sub>2</sub> ZrMe) <sub>2</sub> μ-Me][MePBB] isomer 1 | E<br>H<br>H-qh<br>TS<br>G<br>TS-qh<br>G-qh<br>TS-tr<br>G-tr<br>TS-qh-tr<br>G-qh-tr | -5434.615713<br>-5433.503141<br>-5433.520353<br>0.229145<br>-5433.732286<br>0.206384<br>-5433.726737 |  |  |  | -5434.628724<br>-5433.516843<br>-5433.534102<br>0.229459<br>-5433.746302<br>0.206414<br>-5433.740516<br>0.224201<br>-5433.741044<br>0.201156<br>-5433.735258 |
| <i>anti</i> -[(Cp <sup>''</sup> <sub>2</sub> ZrMe) <sub>2</sub> μ-Me][MePBB] isomer 2 | E<br>H<br>H-qh<br>TS<br>G<br>TS-qh<br>G-qh<br>TS-tr<br>G-tr<br>TS-qh-tr<br>G-qh-tr | -5434.612259<br>-5433.499341<br>-5433.516872<br>0.234823<br>-5433.734164<br>0.206413<br>-5433.723285 |  |  |  | -5434.628124<br>-5433.515779<br>-5433.533267<br>0.234442<br>-5433.750221<br>0.206212<br>-5433.739479<br>0.229184<br>-5433.744963<br>0.200954<br>-5433.734221 |
| <i>syn</i> -[(Cp <sup>''</sup> <sub>2</sub> ZrMe) <sub>2</sub> μ-Me] <sup>+</sup>     | E<br>H<br>H-qh<br>TS<br>G<br>TS-qh<br>G-qh<br>TS-tr<br>G-tr                        | -1302.135940<br>-1301.423892<br>-1301.430173<br>0.112724<br>-1301.536616<br>0.104683<br>-1301.534856 |  |  |  | -1302.167826<br>-1301.455915<br>-1301.462006<br>0.111630<br>-1301.567545<br>0.104273<br>-1301.566279<br>0.106372<br>-1301.562287                             |

|                                                                                             |                                                                                                                                                                        |                                                                                                      |  |  |  |                                                                                                                                                              |
|---------------------------------------------------------------------------------------------|------------------------------------------------------------------------------------------------------------------------------------------------------------------------|------------------------------------------------------------------------------------------------------|--|--|--|--------------------------------------------------------------------------------------------------------------------------------------------------------------|
|                                                                                             | TS-qh-tr<br>G-qh-tr                                                                                                                                                    |                                                                                                      |  |  |  | 0.099015<br>-1301.561021                                                                                                                                     |
| <i>anti</i> -[(Cp <sup>''</sup> <sub>2</sub> ZrMe) <sub>2</sub> μ-Me] <sup>+</sup>          | <i>E</i><br><i>H</i><br><i>H</i> -qh<br><i>TS</i><br><i>G</i><br><i>TS</i> -qh<br><i>G</i> -qh<br><i>TS</i> -tr<br><i>G</i> -tr<br><i>TS</i> -qh-tr<br><i>G</i> -qh-tr | -1302.139287<br>-1301.427453<br>-1301.433503<br>0.113356<br>-1301.540809<br>0.104345<br>-1301.537848 |  |  |  | -1302.171217<br>-1301.459510<br>-1301.465414<br>0.112301<br>-1301.571811<br>0.103788<br>-1301.569202<br>0.107043<br>-1301.566553<br>0.098530<br>-1301.563944 |
| <i>syn</i> -[(Cp <sup>''</sup> <sub>2</sub> ZrMe) <sub>2</sub> μ-Me] <sup>+</sup> -toluene  | <i>E</i><br><i>H</i><br><i>H</i> -qh<br><i>TS</i><br><i>G</i><br><i>TS</i> -qh<br><i>G</i> -qh<br><i>TS</i> -tr<br><i>G</i> -tr<br><i>TS</i> -qh-tr<br><i>G</i> -qh-tr | -1573.673082<br>-1572.822921<br>-1572.831368<br>0.129857<br>-1572.952778<br>0.119120<br>-1572.950488 |  |  |  | -1573.704658<br>-1572.854796<br>-1572.863153<br>0.129719<br>-1572.984515<br>0.118803<br>-1572.981956<br>0.124461<br>-1572.979257<br>0.113545<br>-1572.976698 |
| <i>anti</i> -[(Cp <sup>''</sup> <sub>2</sub> ZrMe) <sub>2</sub> μ-Me] <sup>+</sup> -toluene | <i>E</i><br><i>H</i><br><i>H</i> -qh<br><i>TS</i><br><i>G</i><br><i>TS</i> -qh<br><i>G</i> -qh<br><i>TS</i> -tr<br><i>G</i> -tr<br><i>TS</i> -qh-tr<br><i>G</i> -qh-tr | -1573.678473<br>-1572.828379<br>-1572.836623<br>0.128379<br>-1572.956758<br>0.118700<br>-1572.955323 |  |  |  | -1573.709932<br>-1572.860269<br>-1572.868476<br>0.128962<br>-1572.989231<br>0.118421<br>-1572.986897<br>0.123704<br>-1572.983973<br>0.113163<br>-1572.981639 |

## Boltzmann Weighting of Equilibrium 2

As mentioned in the text, equilibrium 2 involves contact (CIP) and outer-sphere (OSIP) ion-pairs where more than one isomer of each could be located at the M06-2X/TZVP level of theory. In particular, eight to ten OSIP were within  $\Delta G\text{-qh-tr} = 10 \text{ kJ mol}^{-1}$  of the global minimum while three to seven CIP were within 10-20  $\text{kJ mol}^{-1}$  of the global minimum depending on the ligand set. Since dynamic simulations are not possible at this level of theory for systems of this size, we elected to average the individual  $\Delta G\text{-qh-tr}$  values for each possible CIP (+  $\text{Me}_3\text{Al}$ ) and OSIP by using the Boltzmann factors for each reactant, and product. This was achieved by setting up a matrix of these  $\Delta G\text{-qh-tr}$  values (shown below for the most complex EBI example).

|                                               | OSIP                       | $\Delta\Delta G \text{ (kJ mol}^{-1}\text{)}$ | 0.00  | 1.60  | 3.39  | 3.54  | 5.95  | 6.56  | 6.65  | 8.29  | 8.81  | 9.45  |
|-----------------------------------------------|----------------------------|-----------------------------------------------|-------|-------|-------|-------|-------|-------|-------|-------|-------|-------|
| CIP                                           |                            | $\exp(-\Delta\Delta G/RT)$                    | 1.00  | 0.54  | 0.27  | 0.26  | 0.10  | 0.08  | 0.08  | 0.04  | 0.03  | 0.03  |
| $\Delta\Delta G \text{ (kJ mol}^{-1}\text{)}$ | $\exp(-\Delta\Delta G/RT)$ | mol fraction $x_i$                            | 0.41  | 0.22  | 0.11  | 0.11  | 0.04  | 0.03  | 0.03  | 0.02  | 0.01  | 0.01  |
| 0.00                                          | 1.00                       | 0.36                                          | 31.55 | 29.95 | 28.16 | 28.01 | 25.60 | 24.99 | 24.90 | 23.26 | 22.74 | 22.10 |
| 2.45                                          | 0.39                       | 0.14                                          | 34.00 | 32.39 | 30.61 | 30.45 | 28.05 | 27.43 | 27.34 | 25.71 | 25.18 | 24.55 |
| 2.75                                          | 0.35                       | 0.12                                          | 34.30 | 32.70 | 30.91 | 30.76 | 28.35 | 27.74 | 27.65 | 26.01 | 25.49 | 24.85 |
| 2.81                                          | 0.34                       | 0.12                                          | 34.36 | 32.76 | 30.98 | 30.82 | 28.42 | 27.80 | 27.71 | 26.07 | 25.55 | 24.91 |
| 2.86                                          | 0.33                       | 0.12                                          | 34.41 | 32.81 | 31.02 | 30.87 | 28.46 | 27.85 | 27.76 | 26.12 | 25.60 | 24.96 |
| 2.99                                          | 0.32                       | 0.11                                          | 34.54 | 32.93 | 31.15 | 30.99 | 28.59 | 27.97 | 27.89 | 26.25 | 25.72 | 25.09 |
| 6.98                                          | 0.07                       | 0.02                                          | 38.53 | 36.93 | 35.14 | 34.99 | 32.59 | 31.97 | 31.88 | 30.24 | 29.72 | 29.08 |

Then, multiplying it in rows by the Boltzmann factors for the CIP and then in columns by the factors for the OSIP; the resulting matrix elements were then summed to provide the weighted average  $\Delta G\text{-qh-tr}$ . The results are summarized in the Table below, along with the numerical average  $\Delta G\text{-qh-tr}$  and a standard deviation to indicate the spread in those values.

| Entry | $L_2$                     | $\Delta G\text{-qh-tr} \text{ (kJ mol}^{-1}\text{)}$ |                   |                  |
|-------|---------------------------|------------------------------------------------------|-------------------|------------------|
|       |                           | Global minimum values                                | Numerical average | Weighted average |
| 1     | $\text{Cp}_2$             | 24.2                                                 | 24.4 (7.7)        | 23.2             |
| 2     | EBI                       | 31.6                                                 | 29.1(3.6)         | 34.9             |
| 3     | $\text{Me}_2\text{CCp}_2$ | 11.1                                                 | 14.2(7.1)         | 9.7 <sub>6</sub> |
